# Supplementary material
Source: PubMed Central journal article supplement (PMC3799316)
Supplement: 1304074110_pnas.201304074SI.pdf [file 1304074110_pnas.201304074SI.pdf]

# Supporting Information

Luiz et al. 10.1073/pnas.1304074110

**Table S1. Model selection for the effect of dropping the interaction of region with each variable and the effect of dropping variables in a backward stepwise manner**

| Variables                                                                | AIC      | P value for retention |
|--------------------------------------------------------------------------|----------|-----------------------|
| Interactions                                                             |          |                       |
| Full model                                                               | 11794.14 |                       |
| Region* body size                                                        | 11786.39 | 0.509                 |
| Region* schooling behavior                                               | 11787.01 | 0.373                 |
| Region* depth range                                                      | 11785.86 | 0.664                 |
| Region* multihabitat use                                                 | 11791.01 | 0.704                 |
| Region* nocturnal activity                                               | 11787.62 | 0.276                 |
| Region* pelagic larval duration (PLD)                                    | 11795.10 | <b>0.006</b>          |
| Region* spawning Mode                                                    | 11785.47 | 0.809                 |
| Single factors                                                           |          |                       |
| Region*PLD + body size + schooling + nocturnal + depth + spawn + habitat | 11781.22 |                       |
| Region*PLD + body size + schooling + nocturnal + depth + spawn           | 11779.84 | 0.677                 |
| Region*PLD + body size + schooling + nocturnal + depth                   | 11778.20 | 0.326                 |
| <b>Region*PLD + body size + schooling + nocturnal</b>                    | 11779.92 | 0.060                 |
| Region*PLD + body Size + schooling                                       | 11784.63 | <b>0.009</b>          |
| Region*PLD + body Size + nocturnal                                       | 11788.85 | < <b>0.001</b>        |
| Region*PLD + schooling + nocturnal                                       | 11817.86 | < <b>0.001</b>        |

The selected model (only significant variables retained) is indicated in bold. The *P* value shown in each line refers to the significance for the retention of the factor excluded. Shown are Akaike information criteria (AIC) and significance (*P* value). *P* values in bold are significant ( $P < 0.05$ ).

## Other Supporting Information Files

[Dataset S1 \(PDF\)](#)
