# Supplementary material
Source: PubMed Central journal article supplement (PMC3799316)
Supplement: 1304074110_sd01.pdf [file 1304074110_sd01.pdf]

**Dataset S1** – Species used in analyses in this study, examined by literature reviewed in the present study. **Region:** biogeographic region which a species resides; ICP = Indo-Central Pacific; TA = Tropical Atlantic; TEP = Tropical Eastern Atlantic. **Body size:** maximum total length. **Mean PLD:** average of the PLD values observed in the literature and/or collected for this study. **Depth range:** breadth between the minimum and maximum depth recorded. **Schooler:** if is known to form schools; school is defined as cohesive and polarized groups of 20 or more individuals. **Spawn:** type of egg release; DEM = demersal; PEL = pelagic. **Nocturnal:** if is known to actively forage at night. **Transpacific:** Such species occur in both the ICP and in the TEP [Robertson, D .R., Grove, J. S. & McCosker, J. E. 2004 Tropical transpacific shore fishes. *Pac. Sci.* **58**, 507–565], although we treat then as part of the ICP fauna as the most of their ranges are found in the ICP. **Multi-habitat:** Species that use other habitats in addition to structural reefs (soft bottoms, seagrass/macroalgae beds, mangroves and/or estuaries). **Reference:** A list of references used in this table is provided in appendix 1. PS = Present Study, species in which new data on PLD was used in addition to the literature. \* = Species with mean PLD reported for the first time in the literature. **Notes:** 1. Distributional records from online databases contain many errors [Robertson, D. R. 2008 Global biogeographic databases on marine fishes: caveat emptor. *Divers. Distrib.* **14**, 891–892]. Hence we vigorously screened all records obtained from such those sources using guidebooks by professional scientists, and recent taxonomic revisions and faunal lists for localities published in refereed journals. We also reviewed outliers in the OBIS database to assess validity; e.g. records of shallow species in deep water were likely larvae. 2. *Acanthochromis polyacanthus*, a species that does not have larval pelagic phase (PLD = 0) was considered an outlier and excluded from analyses.

| Family        | Genus          | Species         | Region | Range size (km) | Body size (cm) | Mean PLD (days) | Depth range (m) | Schooler | Spawn | Nocturnal | Multi-habitat | Transpacific | Reference |
|---------------|----------------|-----------------|--------|-----------------|----------------|-----------------|-----------------|----------|-------|-----------|---------------|--------------|-----------|
| ACANTHURIDAE  | Acanthurus     | bahianus        | TA     | 8948            | 35             | 52.3            | 38              | YES      | PEL   | NO        | YES           | NO           | 1         |
| ACANTHURIDAE  | Acanthurus     | chirurgus       | TA     | 10477           | 34             | 55.2            | 23              | YES      | PEL   | NO        | YES           | NO           | 1         |
| ACANTHURIDAE  | Acanthurus     | coeruleus       | TA     | 10477           | 36             | 51.6            | 38              | YES      | PEL   | NO        | YES           | NO           | 1         |
| ACANTHURIDAE  | Acanthurus     | lineatus        | ICP    | 17970           | 38             | 39.5            | 15              | YES      | PEL   | NO        | NO            | NO           | 2         |
| ACANTHURIDAE  | Acanthurus     | nigricans       | ICP    | 18153           | 21             | 59.7            | 66              | NO       | PEL   | NO        | NO            | YES          | 2         |
| ACANTHURIDAE  | Acanthurus     | nigrofuscus     | ICP    | 19500           | 21             | 31              | 25              | YES      | PEL   | NO        | NO            | NO           | 3         |
| ACANTHURIDAE  | Acanthurus     | olivaceus       | ICP    | 12355           | 35             | 59.65           | 43              | YES      | PEL   | NO        | YES           | NO           | 3,PS      |
| ACANTHURIDAE  | Acanthurus     | tractus         | TA     | 3819            | 35             | 52.3            | 38              | YES      | PEL   | NO        | YES           | NO           | 1         |
| ACANTHURIDAE  | Acanthurus     | tristegus       | ICP    | 27891           | 27             | 47.4            | 90              | YES      | PEL   | NO        | NO            | YES          | 2,PS      |
| ACANTHURIDAE  | Ctenochaetus   | binotatus       | ICP    | 17970           | 22             | 58.5            | 45              | NO       | PEL   | NO        | NO            | NO           | 3,4       |
| ACANTHURIDAE  | Ctenochaetus   | flavicauda      | ICP    | 3793            | 11.8           | 31              | 30              | NO       | PEL   | NO        | NO            | NO           | PS*       |
| ACANTHURIDAE  | Ctenochaetus   | striatus        | ICP    | 17970           | 26             | 43.87           | 27              | YES      | PEL   | NO        | NO            | NO           | 3,PS      |
| ACANTHURIDAE  | Naso           | annulatus       | ICP    | 24598           | 100            | 62.3            | 59              | YES      | PEL   | NO        | NO            | YES          | PS*       |
| ACANTHURIDAE  | Naso           | brevirostris    | ICP    | 26191           | 60             | 79.65           | 120             | YES      | PEL   | NO        | NO            | YES          | 3         |
| ACANTHURIDAE  | Naso           | hexacanthus     | ICP    | 18323           | 75             | 91.2            | 144             | YES      | PEL   | NO        | NO            | YES          | 3         |
| ACANTHURIDAE  | Naso           | lituratus       | ICP    | 21325           | 46             | 69.4            | 90              | NO       | PEL   | NO        | NO            | YES          | 2         |
| ACANTHURIDAE  | Naso           | unicornis       | ICP    | 18323           | 70             | 73.9            | 179             | NO       | PEL   | NO        | NO            | NO           | 3,PS      |
| ACANTHURIDAE  | Naso           | vlamingii       | ICP    | 19458           | 55             | 77.3            | 49              | YES      | PEL   | NO        | NO            | YES          | PS*       |
| ACANTHURIDAE  | Paracanthurus  | hepatus         | ICP    | 17945           | 31             | 37              | 38              | YES      | PEL   | NO        | NO            | NO           | 2         |
| ACANTHURIDAE  | Zebrasoma      | flavescens      | ICP    | 6244            | 20             | 54              | 44              | NO       | PEL   | NO        | NO            | NO           | PS*       |
| ACANTHURIDAE  | Zebrasoma      | scopas          | ICP    | 17970           | 40             | 55.2            | 59              | NO       | PEL   | NO        | NO            | NO           | 3,PS      |
| ACANTHURIDAE  | Zebrasoma      | veliferum       | ICP    | 11000           | 40             | 35.75           | 29              | NO       | PEL   | NO        | NO            | NO           | 2,PS      |
| ANTENNARIIDAE | Antennarius    | multicellatus   | TA     | 10924           | 20             | 54              | 66              | NO       | PEL   | YES       | NO            | NO           | PS*       |
| ANTENNARIIDAE | Antennarius    | tuberosus       | ICP    | 19458           | 9              | 47.5            | 73              | NO       | PEL   | YES       | NO            | NO           | PS*       |
| APOGONIDAE    | Apogon         | aurolineatus    | TA     | 4199            | 6.4            | 19.5            | 75              | NO       | DEM   | YES       | YES           | NO           | PS*       |
| APOGONIDAE    | Apogon         | binotatus       | TA     | 4091            | 15             | 20.1            | 59              | NO       | DEM   | YES       | NO            | NO           | PS*       |
| APOGONIDAE    | Apogon         | coccineus       | ICP    | 20049           | 6              | 19.7            | 27              | NO       | DEM   | YES       | NO            | NO           | PS*       |
| APOGONIDAE    | Apogon         | compressus      | ICP    | 6305            | 12             | 24              | 18              | NO       | DEM   | YES       | NO            | NO           | 5         |
| APOGONIDAE    | Apogon         | crassiceps      | ICP    | 20629           | 5              | 17.7            | 37              | NO       | DEM   | YES       | NO            | NO           | PS*       |
| APOGONIDAE    | Apogon         | cyanosoma       | ICP    | 4582            | 8              | 21.1            | 49              | NO       | DEM   | YES       | YES           | NO           | 5,6       |
| APOGONIDAE    | Apogon         | doederleini     | ICP    | 8625            | 14             | 22.6            | 3               | NO       | DEM   | YES       | YES           | NO           | 6         |
| APOGONIDAE    | Apogon         | exostigma       | ICP    | 19720           | 11             | 33.5            | 28              | NO       | DEM   | YES       | YES           | NO           | PS*       |
| APOGONIDAE    | Apogon         | fraenatus       | ICP    | 20629           | 11             | 25.3            | 47              | NO       | DEM   | YES       | NO            | NO           | PS*       |
| APOGONIDAE    | Apogon         | imberbis        | TA     | 9115            | 15             | 21.3            | 190             | YES      | DEM   | YES       | YES           | NO           | 7         |
| APOGONIDAE    | Apogon         | maculatus       | TA     | 4199            | 11.1           | 20.7            | 128             | NO       | DEM   | YES       | NO            | NO           | PS*       |
| APOGONIDAE    | Apogon         | nigrofasciatus  | ICP    | 20629           | 8              | 18.5            | 34              | NO       | DEM   | YES       | NO            | NO           | PS*       |
| APOGONIDAE    | Apogon         | novemfasciatus  | ICP    | 11616           | 9              | 29.7            | 3               | NO       | DEM   | YES       | NO            | NO           | PS*       |
| APOGONIDAE    | Apogon         | properuptus     | ICP    | 8518            | 7.5            | 19.2            | 27              | NO       | DEM   | YES       | YES           | NO           | 8         |
| APOGONIDAE    | Apogon         | pseudomaculatus | TA     | 11294           | 8.9            | 26.8            | 99              | NO       | DEM   | YES       | NO            | NO           | PS*       |
| APOGONIDAE    | Apogon         | quadrisquamatus | TA     | 10002           | 7              | 18.7            | 74              | NO       | DEM   | YES       | YES           | NO           | PS*       |
| APOGONIDAE    | Astrapogon     | stellatus       | TA     | 8784            | 8              | 20.2            | 39              | NO       | DEM   | YES       | YES           | NO           | PS*       |
| APOGONIDAE    | Cheilodipterus | macrodon        | ICP    | 19720           | 25             | 16.3            | 40              | NO       | DEM   | YES       | NO            | NO           | 8         |
| APOGONIDAE    | Cheilodipterus | quinquelineatus | ICP    | 20000           | 13             | 17.97           | 40              | YES      | DEM   | YES       | YES           | NO           | 2,5,6     |
| APOGONIDAE    | Foa            | brachygramma    | ICP    | 18323           | 8              | 30.6            | 134             | NO       | DEM   | YES       | YES           | NO           | 9         |
| APOGONIDAE    | Fowleria       | marmorata       | ICP    | 21011           | 9              | 41.3            | 37              | NO       | DEM   | YES       | NO            | NO           | PS*       |
| APOGONIDAE    | Gymnapogon     | urospilotus     | ICP    | 6771            | 3.6            | 34.6            | 7               | NO       | DEM   | YES       | NO            | NO           | PS*       |
| APOGONIDAE    | Nectamia       | bandanensis     | ICP    | 9792            | 9              | 24.5            | 24              | NO       | DEM   | YES       | NO            | NO           | PS*       |
| APOGONIDAE    | Phaeoptyx      | pigmentaria     | TA     | 10924           | 8              | 20              | 37              | NO       | DEM   | YES       | NO            | NO           | PS*       |
| APOGONIDAE    | Sphaeraemia    | orbicularis     | ICP    | 17945           | 10             | 17              | 5               | YES      | DEM   | YES       | YES           | NO           | 2         |
| AULOSTOMIDAE  | Aulostomus     | chinensis       | ICP    | 27631           | 80             | 93.3            | 119             | NO       | PEL   | NO        | YES           | YES          | PS*       |
| AULOSTOMIDAE  | Aulostomus     | strigosus       | TA     | 6335            | 75             | 93              | 20              | NO       | PEL   | NO        | YES           | NO           | 10        |
| BALISTIDAE    | Balistapus     | undulatus       | ICP    | 20629           | 30             | 51.3            | 48              | NO       | PEL   | NO        | NO            | NO           | PS*       |
| BALISTIDAE    | Balistes       | vetula          | TA     | 13940           | 50             | 75              | 273             | NO       | PEL   | NO        | YES           | NO           | 11        |
| BALISTIDAE    | Balistoides    | conspicillum    | ICP    | 15924           | 26             | 36              | 74              | NO       | PEL   | NO        | NO            | NO           | 2         |
| BALISTIDAE    | PSeudobalistes | flavimarginatus | ICP    | 20629           | 60             | 44.5            | 48              | NO       | PEL   | NO        | YES           | NO           | PS*       |
| BALISTIDAE    | Rhineacanthus  | aculeatus       | ICP    | 18323           | 30             | 45              | 50              | NO       | PEL   | NO        | NO            | NO           | 2,PS      |

|                 |                  |               |     |       |      |       |     |     |     |     |     |     |        |
|-----------------|------------------|---------------|-----|-------|------|-------|-----|-----|-----|-----|-----|-----|--------|
| BALISTIDAE      | Rhinecanthus     | rectangulus   | ICP | 19500 | 30   | 43.5  | 10  | NO  | PEL | NO  | NO  | NO  | 2      |
| BLENNIIDAE      | Hypleurochilus   | bermudensis   | TA  | 3819  | 10.2 | 25.4  | 6   | NO  | DEM | NO  | NO  | NO  | PS*    |
| BLENNIIDAE      | Ophioblennius    | macclurei     | TA  | 4199  | 20   | 38    | 8   | NO  | DEM | NO  | NO  | NO  | 10     |
| BLENNIIDAE      | Ophioblennius    | steindachneri | TEP | 5148  | 25   | 50    | 18  | NO  | DEM | NO  | NO  | NO  | 12     |
| BLENNIIDAE      | Parablennius     | marmoratus    | TA  | 10861 | 10.8 | 23.4  | 10  | NO  | DEM | NO  | NO  | NO  | PS*    |
| BLENNIIDAE      | Parablennius     | pilicornis    | TA  | 10995 | 12.7 | 30.5  | 25  | NO  | DEM | NO  | NO  | NO  | 13     |
| BLENNIIDAE      | Petroscirtes     | fallax        | ICP | 2530  | 9.5  | 21    | 15  | NO  | DEM | NO  | NO  | NO  | 6      |
| BLENNIIDAE      | Petroscirtes     | mitratus      | ICP | 17000 | 8    | 24.5  | 15  | NO  | DEM | NO  | YES | NO  | 6      |
| BOTHIDAE        | Bothus           | mancus        | ICP | 27631 | 48   | 69.3  | 147 | NO  | PEL | NO  | YES | YES | PS*    |
| BOTHIDAE        | Bothus           | pantherinus   | ICP | 21011 | 30   | 63.7  | 147 | NO  | PEL | NO  | YES | NO  | PS*    |
| BOTHIDAE        | Bothus           | podas         | TA  | 9115  | 45   | 33.7  | 385 | NO  | PEL | NO  | YES | NO  | 7      |
| CAESIONIDAE     | Caesio           | caerulaurea   | ICP | 17390 | 35   | 22    | 45  | YES | PEL | NO  | NO  | NO  | PS*    |
| CAESIONIDAE     | Pterocaesio      | chrysozona    | ICP | 13040 | 21   | 42    | 40  | YES | PEL | NO  | NO  | NO  | 14     |
| CAESIONIDAE     | Pterocaesio      | marri         | ICP | 19840 | 35   | 42    | 5   | YES | PEL | NO  | NO  | NO  | 15     |
| CALLIONYMIDAE   | Synchiropus      | splendidus    | ICP | 6800  | 6    | 36    | 17  | NO  | DEM | NO  | YES | NO  | 2      |
| CARANGIDAE      | Atule            | mate          | ICP | 19720 | 30   | 50    | 79  | YES | PEL | NO  | YES | NO  | 16     |
| CARANGIDAE      | Caranx           | melampygus    | ICP | 19720 | 100  | 57.6  | 190 | YES | PEL | NO  | YES | YES | PS*    |
| CARAPIDAE       | Carapus          | mourlani      | ICP | 21011 | 17   | 73    | 149 | NO  | PEL | YES | NO  | NO  | PS*    |
| CARAPIDAE       | Encheliophis     | boraborensis  | ICP | 15611 | 30   | 50.2  | 149 | NO  | PEL | YES | NO  | NO  | PS*    |
| CARAPIDAE       | Encheliophis     | gracilis      | ICP | 19720 | 27.5 | 74.6  | 61  | NO  | PEL | YES | NO  | NO  | PS*    |
| CARAPIDAE       | Encheliophis     | homei         | ICP | 15611 | 19   | 79.9  | 30  | NO  | PEL | YES | NO  | NO  | PS*    |
| CHAENOPSIDAE    | Acanthemblemaria | aspera        | TA  | 4091  | 4    | 20.7  | 12  | NO  | DEM | NO  | NO  | NO  | PS*    |
| CHAENOPSIDAE    | Chaenopsis       | limbaughi     | TA  | 2582  | 8.2  | 30.5  | 15  | NO  | DEM | NO  | YES | NO  | PS*    |
| CHAENOPSIDAE    | Emblemaria       | pandionis     | TA  | 3819  | 7    | 25.3  | 11  | NO  | DEM | NO  | YES | NO  | PS*    |
| CHAETODONTIDAE  | Chaetodon        | auriga        | ICP | 21500 | 23   | 44.27 | 34  | NO  | PEL | NO  | YES | NO  | 2,3,17 |
| CHAETODONTIDAE  | Chaetodon        | baronessa     | ICP | 8876  | 16   | 35.5  | 15  | NO  | PEL | NO  | NO  | NO  | 2,3    |
| CHAETODONTIDAE  | Chaetodon        | capistratus   | TA  | 4199  | 20   | 38    | 18  | NO  | PEL | NO  | YES | NO  | PS*    |
| CHAETODONTIDAE  | Chaetodon        | citrinellus   | ICP | 18549 | 13   | 50.5  | 35  | NO  | PEL | NO  | NO  | NO  | PS*    |
| CHAETODONTIDAE  | Chaetodon        | collare       | ICP | 7810  | 18   | 43    | 12  | NO  | PEL | NO  | YES | NO  | 2      |
| CHAETODONTIDAE  | Chaetodon        | ephippium     | ICP | 14637 | 23   | 38.5  | 30  | NO  | PEL | NO  | NO  | NO  | PS*    |
| CHAETODONTIDAE  | Chaetodon        | flavivostrius | ICP | 8369  | 20   | 47.27 | 18  | NO  | PEL | NO  | YES | NO  | 17     |
| CHAETODONTIDAE  | Chaetodon        | kleinii       | ICP | 21500 | 15   | 56    | 57  | NO  | PEL | NO  | NO  | NO  | 2      |
| CHAETODONTIDAE  | Chaetodon        | lineolatus    | ICP | 18323 | 30   | 54    | 169 | NO  | PEL | NO  | NO  | NO  | 2      |
| CHAETODONTIDAE  | Chaetodon        | lunula        | ICP | 21500 | 21   | 43    | 30  | NO  | PEL | NO  | NO  | NO  | PS*    |
| CHAETODONTIDAE  | Chaetodon        | lunulatus     | ICP | 11849 | 15   | 39.3  | 17  | NO  | PEL | NO  | NO  | NO  | PS*    |
| CHAETODONTIDAE  | Chaetodon        | miliaris      | ICP | 1397  | 13   | 60    | 250 | NO  | PEL | NO  | NO  | NO  | 16     |
| CHAETODONTIDAE  | Chaetodon        | ocellatus     | TA  | 9391  | 15   | 35.5  | 30  | NO  | PEL | NO  | YES | NO  | PS*    |
| CHAETODONTIDAE  | Chaetodon        | ornatissimus  | ICP | 16879 | 18   | 62.5  | 35  | NO  | PEL | NO  | NO  | NO  | PS*    |
| CHAETODONTIDAE  | Chaetodon        | plebeius      | ICP | 10000 | 15   | 44    | 10  | NO  | PEL | NO  | NO  | NO  | 3,6,18 |
| CHAETODONTIDAE  | Chaetodon        | rainfordi     | ICP | 2000  | 15   | 31.4  | 14  | NO  | PEL | NO  | NO  | NO  | 6,18   |
| CHAETODONTIDAE  | Chaetodon        | sedentarius   | TA  | 10039 | 18   | 52    | 87  | NO  | PEL | NO  | NO  | NO  | PS*    |
| CHAETODONTIDAE  | Chaetodon        | speculum      | ICP | 8700  | 18   | 44.7  | 27  | NO  | PEL | NO  | NO  | NO  | 2,PS   |
| CHAETODONTIDAE  | Chaetodon        | striatus      | TA  | 10477 | 20   | 49    | 52  | NO  | PEL | NO  | YES | NO  | PS*    |
| CHAETODONTIDAE  | Chaetodon        | trifascialis  | ICP | 19500 | 18   | 35.7  | 28  | NO  | PEL | NO  | NO  | NO  | 2,PS   |
| CHAETODONTIDAE  | Chaetodon        | ulietensis    | ICP | 11992 | 15   | 41    | 28  | NO  | PEL | NO  | YES | NO  | PS*    |
| CHAETODONTIDAE  | Chaetodon        | unimaculatus  | ICP | 16986 | 20   | 35    | 59  | NO  | PEL | NO  | NO  | YES | 2      |
| CHAETODONTIDAE  | Chaetodon        | vagabundus    | ICP | 18323 | 23   | 42.26 | 30  | NO  | PEL | NO  | YES | NO  | 19,PS  |
| CHAETODONTIDAE  | Chelmon          | rostratus     | ICP | 7170  | 20   | 26.25 | 24  | NO  | PEL | NO  | YES | NO  | 2,6    |
| CHAETODONTIDAE  | Forcipiger       | flavissimus   | ICP | 27631 | 22   | 50.7  | 113 | NO  | PEL | NO  | NO  | YES | 2      |
| CHAETODONTIDAE  | Heniochus        | acuminatus    | ICP | 19500 | 25   | 40.83 | 73  | NO  | PEL | NO  | NO  | NO  | 3      |
| CHAETODONTIDAE  | Heniochus        | chrysostratus | ICP | 13455 | 18   | 32.7  | 38  | NO  | PEL | NO  | YES | NO  | PS*    |
| CHAETODONTIDAE  | Heniochus        | diphreutes    | ICP | 16823 | 21   | 32    | 195 | YES | PEL | NO  | NO  | NO  | 2      |
| CIRRHITIDAE     | Cirrhitichthys   | oxycephalus   | ICP | 27631 | 10   | 51    | 39  | NO  | PEL | NO  | YES | YES | 2      |
| CIRRHITIDAE     | Neocirrhites     | armatus       | ICP | 8033  | 9    | 48    | 9   | NO  | PEL | NO  | NO  | NO  | 2      |
| CIRRHITIDAE     | Oxycirrhites     | typus         | ICP | 27891 | 13   | 69    | 90  | NO  | PEL | NO  | NO  | YES | 2      |
| CIRRHITIDAE     | Paracirrhites    | arcatus       | ICP | 20329 | 14   | 49.7  | 90  | NO  | PEL | NO  | NO  | NO  | PS*    |
| DACTYLOPTERIDAE | Dactyloptena     | orientalis    | ICP | 20629 | 40   | 43.4  | 99  | NO  | PEL | YES | YES | NO  | PS*    |

|                 |               |                |     |       |     |       |     |     |     |     |     |     |             |
|-----------------|---------------|----------------|-----|-------|-----|-------|-----|-----|-----|-----|-----|-----|-------------|
| DACTYLOPTERIDAE | Dactylopterus | volitans       | TA  | 12289 | 45  | 24    | 99  | NO  | PEL | YES | YES | NO  | PS*         |
| DACTYLOSCOPIDAE | Dactyloscopus | crossotus      | TA  | 9501  | 7.5 | 19.7  | 8   | NO  | DEM | NO  | NO  | NO  | PS*         |
| DACTYLOSCOPIDAE | Gillellus     | greyae         | TA  | 8030  | 9.8 | 28.5  | 8   | NO  | DEM | NO  | NO  | NO  | PS*         |
| DACTYLOSCOPIDAE | Gillellus     | uranidea       | TA  | 2582  | 4.5 | 20.9  | 12  | NO  | DEM | NO  | NO  | NO  | PS*         |
| EPHIPPIDAE      | Platax        | pinnatus       | ICP | 7120  | 45  | 25    | 15  | YES | PEL | NO  | YES | NO  | 2           |
| EPINEPHELIDAE   | Cephalopholis | argus          | ICP | 19720 | 60  | 27.5  | 39  | NO  | PEL | NO  | NO  | NO  | PS*         |
| EPINEPHELIDAE   | Cephalopholis | boenak         | ICP | 13862 | 26  | 31    | 63  | NO  | PEL | NO  | YES | NO  | PS*         |
| EPINEPHELIDAE   | Cephalopholis | urodeta        | ICP | 10242 | 27  | 24.3  | 59  | NO  | PEL | NO  | NO  | NO  | PS*         |
| EPINEPHELIDAE   | Cromileptes   | altivelis      | ICP | 8753  | 70  | 24    | 38  | NO  | PEL | NO  | NO  | NO  | 2           |
| EPINEPHELIDAE   | Epinephelus   | adscensionis   | TA  | 11294 | 62  | 40    | 119 | NO  | PEL | NO  | NO  | NO  | 10          |
| EPINEPHELIDAE   | Epinephelus   | akaara         | ICP | 3300  | 30  | 30    | 50  | NO  | PEL | NO  | NO  | NO  | PS*         |
| EPINEPHELIDAE   | Epinephelus   | areolatus      | ICP | 16358 | 40  | 18    | 194 | NO  | PEL | NO  | YES | NO  | PS*         |
| EPINEPHELIDAE   | Epinephelus   | corallicola    | ICP | 7869  | 49  | 41    | 25  | NO  | PEL | NO  | YES | NO  | 3           |
| EPINEPHELIDAE   | Epinephelus   | hexagonatus    | ICP | 21500 | 26  | 24.7  | 30  | NO  | PEL | NO  | NO  | NO  | PS*         |
| EPINEPHELIDAE   | Epinephelus   | itajara        | TA  | 11294 | 250 | 55    | 95  | NO  | PEL | NO  | YES | NO  | 50          |
| EPINEPHELIDAE   | Epinephelus   | marginatus     | TA  | 13077 | 150 | 24.6  | 292 | NO  | PEL | NO  | NO  | NO  | 7           |
| EPINEPHELIDAE   | Epinephelus   | merra          | ICP | 19458 | 32  | 29.6  | 50  | NO  | PEL | NO  | NO  | NO  | PS*         |
| EPINEPHELIDAE   | Epinephelus   | striatus       | TA  | 4199  | 100 | 42    | 89  | NO  | PEL | NO  | YES | NO  | 51          |
| EPINEPHELIDAE   | Mycteroperca  | bonaci         | TA  | 8000  | 150 | 41    | 27  | NO  | PEL | NO  | YES | NO  | 52          |
| EPINEPHELIDAE   | Mycteroperca  | microlepis     | TA  | 10000 | 145 | 43    | 112 | NO  | PEL | NO  | YES | NO  | 52          |
| EPINEPHELIDAE   | Plectropomus  | leopardus      | ICP | 9157  | 120 | 25.2  | 97  | NO  | PEL | NO  | NO  | NO  | 55          |
| EPINEPHELIDAE   | Plectropomus  | maculatus      | ICP | 6305  | 125 | 27    | 95  | NO  | PEL | NO  | YES | NO  | 39          |
| FISTULARIIDAE   | Fistularia    | commersonii    | ICP | 27631 | 150 | 46    | 132 | NO  | PEL | NO  | YES | YES | PS*         |
| GOBIIDAE        | Amblygobius   | phalaena       | ICP | 13362 | 15  | 19.66 | 18  | NO  | DEM | NO  | YES | NO  | 20          |
| GOBIIDAE        | Barbulifer    | ceuthoecus     | TA  | 9501  | 3   | 39.2  | 5   | NO  | DEM | NO  | YES | NO  | PS*         |
| GOBIIDAE        | Bathygobius   | coalitus       | ICP | 19840 | 12  | 40    | 5   | NO  | DEM | NO  | NO  | NO  | 21          |
| GOBIIDAE        | Bathygobius   | soporator      | TA  | 11294 | 15  | 29    | 16  | NO  | DEM | NO  | YES | NO  | PS*         |
| GOBIIDAE        | Coryphopterus | glaucofraenum  | TA  | 10477 | 8   | 25.26 | 43  | NO  | DEM | NO  | YES | NO  | 22,PS       |
| GOBIIDAE        | Coryphopterus | kuna           | TA  | 2790  | 2.2 | 61.35 | 15  | NO  | DEM | NO  | YES | NO  | 23          |
| GOBIIDAE        | Elacatinus    | evelynae       | TA  | 2582  | 4   | 22.3  | 52  | NO  | DEM | NO  | NO  | NO  | 24          |
| GOBIIDAE        | Elacatinus    | macrodon       | TA  | 2967  | 5   | 28.7  | 7   | NO  | DEM | NO  | NO  | NO  | PS*         |
| GOBIIDAE        | Elacatinus    | oceanops       | TA  | 1577  | 5   | 30    | 44  | NO  | DEM | NO  | NO  | NO  | PS*         |
| GOBIIDAE        | Elacatinus    | randalli       | TA  | 970   | 4.6 | 38    | 60  | NO  | DEM | NO  | NO  | NO  | PS*         |
| GOBIIDAE        | Eviota        | melasma        | ICP | 9792  | 3.2 | 26.2  | 20  | NO  | DEM | NO  | NO  | NO  | PS*         |
| GOBIIDAE        | Eviota        | queenslandica  | ICP | 8666  | 3   | 24.2  | 19  | NO  | DEM | NO  | NO  | NO  | PS*         |
| GOBIIDAE        | Eviota        | sigillata      | ICP | 11312 | 2.5 | 24.7  | 17  | NO  | DEM | NO  | YES | NO  | PS*         |
| GOBIIDAE        | Gnatholepis   | cauerensis     | ICP | 18549 | 5.3 | 39.8  | 48  | NO  | DEM | NO  | YES | NO  | PS*         |
| GOBIIDAE        | Gnatholepis   | thompsoni      | TA  | 12000 | 8.2 | 73    | 50  | NO  | DEM | NO  | YES | NO  | 10,14,22,PS |
| GOBIIDAE        | Gobiosoma     | grosvenori     | TA  | 3212  | 3   | 21.3  | 2   | NO  | DEM | NO  | YES | NO  | PS*         |
| GOBIIDAE        | Koumansetta   | rainfordi      | ICP | 8000  | 8   | 33.76 | 28  | NO  | DEM | NO  | YES | NO  | 6,20        |
| GOBIIDAE        | Lythrypnus    | dalli          | TEP | 5148  | 6.4 | 58.3  | 76  | NO  | DEM | NO  | NO  | NO  | 25,26,27    |
| GOBIIDAE        | Microgobius   | carri          | TA  | 9026  | 7.5 | 33.3  | 15  | NO  | DEM | NO  | YES | NO  | PS*         |
| GOBIIDAE        | Nes           | longus         | TA  | 2967  | 10  | 29    | 23  | NO  | DEM | NO  | YES | NO  | PS*         |
| GOBIIDAE        | Paragobiodon  | echinocephalus | ICP | 19500 | 4   | 36    | 9   | NO  | DEM | NO  | NO  | NO  | 6           |
| GOBIIDAE        | Paragobiodon  | lacunicolus    | ICP | 16770 | 3   | 31    | 20  | NO  | DEM | NO  | NO  | NO  | 6           |
| GOBIIDAE        | Paragobiodon  | melanosomus    | ICP | 10354 | 3.5 | 42.3  | 14  | NO  | DEM | NO  | NO  | NO  | 6           |
| GOBIIDAE        | Priolepis     | hipoliti       | TA  | 3819  | 4   | 55.4  | 129 | NO  | DEM | NO  | NO  | NO  | PS*         |
| GOBIIDAE        | Trimma        | benjamini      | ICP | 7567  | 3   | 33.9  | 45  | NO  | DEM | NO  | NO  | NO  | 28          |
| GOBIIDAE        | Trimma        | nasa           | ICP | 6880  | 2.8 | 33.9  | 41  | NO  | DEM | NO  | NO  | NO  | 29          |
| HAEMULIDAE      | Anisotremus   | surinamensis   | TA  | 10861 | 76  | 19.5  | 20  | NO  | PEL | NO  | NO  | NO  | 31,PS       |
| HAEMULIDAE      | Anisotremus   | virginicus     | TA  | 10861 | 40  | 16.95 | 18  | YES | PEL | NO  | NO  | NO  | 31,PS       |
| HAEMULIDAE      | Haemulon      | aurolineatum   | TA  | 10861 | 25  | 19.3  | 30  | YES | PEL | NO  | YES | NO  | PS*         |
| HAEMULIDAE      | Haemulon      | chrysargyreum  | TA  | 7595  | 23  | 22    | 25  | YES | PEL | NO  | YES | NO  | PS*         |
| HAEMULIDAE      | Haemulon      | flavolineatum  | TA  | 4091  | 30  | 17    | 60  | YES | PEL | NO  | YES | NO  | 30,31       |
| HAEMULIDAE      | Haemulon      | melanurum      | TA  | 4199  | 35  | 18.4  | 47  | YES | PEL | NO  | YES | NO  | PS*         |
| HAEMULIDAE      | Haemulon      | parra          | TA  | 10764 | 41  | 17.3  | 27  | YES | PEL | NO  | YES | NO  | 31,PS       |
| HAEMULIDAE      | Haemulon      | plumierii      | TA  | 10764 | 53  | 22.6  | 37  | NO  | PEL | NO  | YES | NO  | PS*         |

|               |                 |                   |     |       |      |        |     |     |     |     |     |    |          |
|---------------|-----------------|-------------------|-----|-------|------|--------|-----|-----|-----|-----|-----|----|----------|
| HAEMULIDAE    | Haemulon        | striatum          | TA  | 9391  | 28   | 21.125 | 90  | YES | PEL | NO  | YES | NO | PS*      |
| HOLOCENTRIDAE | Holocentrus     | adscensionis      | TA  | 11294 | 45   | 55.6   | 180 | YES | PEL | YES | NO  | NO | 10,14,32 |
| HOLOCENTRIDAE | Holocentrus     | rufus             | TA  | 9391  | 44   | 44.1   | 32  | YES | PEL | YES | NO  | NO | 32       |
| HOLOCENTRIDAE | Myripristis     | jacobus           | TA  | 11294 | 25   | 53.8   | 100 | YES | PEL | YES | NO  | NO | 10,32    |
| HOLOCENTRIDAE | Myripristis     | pralinia          | ICP | 19840 | 20   | 67     | 42  | NO  | PEL | YES | NO  | NO | PS*      |
| HOLOCENTRIDAE | Neoniphon       | argenteus         | ICP | 18549 | 19   | 41     | 37  | NO  | PEL | YES | NO  | NO | PS*      |
| HOLOCENTRIDAE | Neoniphon       | marianus          | TA  | 3819  | 22   | 39.3   | 69  | NO  | PEL | YES | NO  | NO | 32       |
| HOLOCENTRIDAE | Neoniphon       | sammara           | ICP | 19720 | 30   | 47     | 46  | YES | PEL | YES | NO  | NO | PS*      |
| HOLOCENTRIDAE | Plectrypops     | retrospinis       | TA  | 10386 | 15   | 43.6   | 17  | NO  | PEL | YES | NO  | NO | 32       |
| HOLOCENTRIDAE | Sargocentron    | coruscum          | TA  | 3819  | 13.5 | 35.5   | 29  | NO  | PEL | YES | NO  | NO | 32       |
| HOLOCENTRIDAE | Sargocentron    | microstoma        | ICP | 15099 | 19   | 40.3   | 182 | NO  | PEL | YES | NO  | NO | PS*      |
| HOLOCENTRIDAE | Sargocentron    | punctatissimum    | ICP | 23259 | 13   | 45     | 183 | NO  | PEL | YES | YES | NO | PS*      |
| HOLOCENTRIDAE | Sargocentron    | spiniferum        | ICP | 21500 | 45   | 39.8   | 121 | NO  | PEL | YES | NO  | NO | PS*      |
| HOLOCENTRIDAE | Sargocentron    | vexillarium       | TA  | 3819  | 17.2 | 35.9   | 19  | NO  | PEL | YES | NO  | NO | 32       |
| LABRIDAE      | Anampses        | caeruleopunctatus | ICP | 23400 | 42   | 25     | 27  | NO  | PEL | NO  | NO  | NO | 2        |
| LABRIDAE      | Anampses        | chrysocephalus    | ICP | 2100  | 17   | 29.5   | 127 | NO  | PEL | NO  | NO  | NO | 33       |
| LABRIDAE      | Anampses        | cuvier            | ICP | 2100  | 31   | 44.5   | 24  | NO  | PEL | NO  | NO  | NO | 33       |
| LABRIDAE      | Anampses        | twistii           | ICP | 20000 | 18   | 28.8   | 25  | NO  | PEL | NO  | NO  | NO | 33       |
| LABRIDAE      | Bodianus        | axillaris         | ICP | 21325 | 20   | 23.5   | 98  | NO  | PEL | NO  | NO  | NO | 33       |
| LABRIDAE      | Bodianus        | bilunulatus       | ICP | 19375 | 55   | 66.8   | 152 | NO  | PEL | NO  | NO  | NO | 33       |
| LABRIDAE      | Bodianus        | diplotaenia       | TEP | 7363  | 76   | 39.85  | 71  | NO  | PEL | NO  | YES | NO | 33,34    |
| LABRIDAE      | Bodianus        | eclancheri        | TEP | 3860  | 60   | 32.3   | 41  | NO  | PEL | NO  | NO  | NO | 34       |
| LABRIDAE      | Bodianus        | mesothorax        | ICP | 4977  | 25   | 30.3   | 35  | NO  | PEL | NO  | NO  | NO | 33       |
| LABRIDAE      | Bodianus        | perditio          | ICP | 20329 | 80   | 59.6   | 140 | NO  | PEL | NO  | NO  | NO | PS*      |
| LABRIDAE      | Bodianus        | rufus             | TA  | 10861 | 50   | 36.6   | 69  | NO  | PEL | NO  | NO  | NO | 33       |
| LABRIDAE      | Bolbometopon    | muricatum         | ICP | 21680 | 130  | 31     | 29  | YES | PEL | NO  | NO  | NO | 2        |
| LABRIDAE      | Cheilinus       | chlorourus        | ICP | 19580 | 36   | 27.1   | 29  | NO  | PEL | NO  | NO  | NO | 33       |
| LABRIDAE      | Cheilinus       | fasciatus         | ICP | 17000 | 36   | 25.7   | 56  | NO  | PEL | NO  | YES | NO | 33       |
| LABRIDAE      | Cheilinus       | trilobatus        | ICP | 19000 | 40   | 29.6   | 29  | NO  | PEL | NO  | YES | NO | 33       |
| LABRIDAE      | Cheilinus       | undulatus         | ICP | 21325 | 229  | 34.3   | 99  | NO  | PEL | NO  | YES | NO | 33       |
| LABRIDAE      | Cheilio         | inermis           | ICP | 23400 | 50   | 56.1   | 29  | NO  | PEL | NO  | YES | NO | 33       |
| LABRIDAE      | Choerodon       | anchorago         | ICP | 8700  | 38   | 19.3   | 24  | NO  | PEL | NO  | YES | NO | 33       |
| LABRIDAE      | Choerodon       | fasciatus         | ICP | 6908  | 30   | 20     | 30  | NO  | PEL | NO  | NO  | NO | 2        |
| LABRIDAE      | Choerodon       | graphicus         | ICP | 1876  | 46   | 27     | 29  | NO  | PEL | NO  | YES | NO | PS*      |
| LABRIDAE      | Cirrhilabrus    | cyanopleura       | ICP | 6235  | 10   | 25.55  | 28  | NO  | PEL | NO  | NO  | NO | 2,33     |
| LABRIDAE      | Cirrhilabrus    | scottorum         | ICP | 8369  | 13   | 27     | 37  | NO  | PEL | NO  | NO  | NO | PS*      |
| LABRIDAE      | Cirrhilabrus    | temminkii         | ICP | 4980  | 10   | 27.3   | 32  | NO  | PEL | NO  | NO  | NO | 2,6      |
| LABRIDAE      | Clepticus       | parrae            | TA  | 4199  | 30   | 38.5   | 39  | YES | PEL | NO  | NO  | NO | 33       |
| LABRIDAE      | Coris           | aygula            | ICP | 20158 | 120  | 51.5   | 28  | NO  | PEL | NO  | YES | NO | 2,3      |
| LABRIDAE      | Coris           | batuensis         | ICP | 14574 | 17   | 27.55  | 30  | NO  | PEL | NO  | YES | NO | 2,6,33   |
| LABRIDAE      | Coris           | flavovittata      | ICP | 2100  | 50.8 | 53     | 97  | NO  | PEL | NO  | YES | NO | 33       |
| LABRIDAE      | Coris           | gaimard           | ICP | 11600 | 40   | 45.76  | 49  | NO  | PEL | NO  | YES | NO | 2,33     |
| LABRIDAE      | Coris           | picta             | ICP | 3148  | 25   | 46.2   | 22  | NO  | PEL | NO  | YES | NO | PS*      |
| LABRIDAE      | Coris           | venusta           | ICP | 2100  | 19.3 | 46.1   | 8   | NO  | PEL | NO  | YES | NO | 33       |
| LABRIDAE      | Cymolutes       | lecluse           | ICP | 2100  | 17.8 | 75.9   | 118 | NO  | PEL | NO  | YES | NO | 33       |
| LABRIDAE      | Cymolutes       | praetextatus      | ICP | 17970 | 20   | 71     | 5   | NO  | PEL | NO  | NO  | NO | 33       |
| LABRIDAE      | Diproctacanthus | xanthurus         | ICP | 5400  | 8    | 17.3   | 18  | NO  | PEL | NO  | NO  | NO | 33       |
| LABRIDAE      | Doratonotus     | megalepis         | TA  | 11433 | 9.4  | 21.9   | 14  | NO  | PEL | NO  | YES | NO | 33       |
| LABRIDAE      | Epibulus        | insidiator        | ICP | 20000 | 54   | 30.4   | 41  | NO  | PEL | NO  | NO  | NO | 33       |
| LABRIDAE      | Gomphosus       | varius            | ICP | 11600 | 30   | 56.6   | 28  | NO  | PEL | NO  | NO  | NO | 2,33     |
| LABRIDAE      | Halichoeres     | adustus           | TEP | 3000  | 12.5 | 33     | 2   | NO  | PEL | NO  | NO  | NO | 34       |
| LABRIDAE      | Halichoeres     | argus             | ICP | 11258 | 12   | 25     | 10  | NO  | PEL | NO  | YES | NO | 33       |
| LABRIDAE      | Halichoeres     | biocellatus       | ICP | 7959  | 12   | 24.26  | 28  | NO  | PEL | NO  | YES | NO | 2,33     |
| LABRIDAE      | Halichoeres     | bivittatus        | TA  | 9391  | 22   | 22.3   | 14  | NO  | PEL | NO  | YES | NO | 33,PS    |
| LABRIDAE      | Halichoeres     | chierchiaie       | TEP | 4530  | 17.5 | 31.3   | 67  | NO  | PEL | NO  | YES | NO | 33,34    |
| LABRIDAE      | Halichoeres     | chloropterus      | ICP | 6200  | 19   | 21.1   | 10  | NO  | PEL | NO  | YES | NO | 33       |
| LABRIDAE      | Halichoeres     | chrysus           | ICP | 6160  | 12   | 26.1   | 58  | NO  | PEL | NO  | YES | NO | 33       |

|          |                  |                |     |       |      |       |     |     |     |    |     |     |            |
|----------|------------------|----------------|-----|-------|------|-------|-----|-----|-----|----|-----|-----|------------|
| LABRIDAE | Halichoeres      | discolor       | TEP | 10    | 15   | 32    | 26  | NO  | PEL | NO | NO  | NO  | 34         |
| LABRIDAE | Halichoeres      | dispilus       | TEP | 5675  | 25   | 40.25 | 74  | NO  | PEL | NO | YES | NO  | 33         |
| LABRIDAE | Halichoeres      | garnoti        | TA  | 3819  | 30   | 24.9  | 78  | NO  | PEL | NO | YES | NO  | 33,PS      |
| LABRIDAE | Halichoeres      | hortulanus     | ICP | 20600 | 27   | 32.5  | 29  | NO  | PEL | NO | YES | NO  | 33         |
| LABRIDAE | Halichoeres      | insularis      | TEP | 30    | 7    | 35.5  | 3   | NO  | PEL | NO | YES | NO  | 34         |
| LABRIDAE | Halichoeres      | maculipinna    | TA  | 3819  | 15   | 29.5  | 22  | NO  | PEL | NO | YES | NO  | 3,33,PS    |
| LABRIDAE | Halichoeres      | margaritaceus  | ICP | 13400 | 12.5 | 21.7  | 5   | NO  | PEL | NO | NO  | NO  | 33         |
| LABRIDAE | Halichoeres      | marginatus     | ICP | 20600 | 18   | 22.2  | 30  | NO  | PEL | NO | NO  | NO  | 33         |
| LABRIDAE | Halichoeres      | melanotis      | TEP | 4530  | 15   | 35.7  | 29  | NO  | PEL | NO | YES | NO  | 33         |
| LABRIDAE | Halichoeres      | melanurus      | ICP | 8957  | 12   | 24.53 | 24  | NO  | PEL | NO | NO  | NO  | 6,33       |
| LABRIDAE | Halichoeres      | nebulosus      | ICP | 13040 | 12   | 23.9  | 39  | NO  | PEL | NO | YES | NO  | 33         |
| LABRIDAE | Halichoeres      | nicholsi       | TEP | 4530  | 38   | 31.4  | 50  | NO  | PEL | NO | YES | NO  | 33,34      |
| LABRIDAE | Halichoeres      | notospilus     | TEP | 5675  | 25   | 37.7  | 10  | NO  | PEL | NO | YES | NO  | 33,34      |
| LABRIDAE | Halichoeres      | ornatissimus   | ICP | 11600 | 18   | 39.5  | 11  | NO  | PEL | NO | NO  | NO  | 33         |
| LABRIDAE | Halichoeres      | pictus         | TA  | 4091  | 13   | 24.9  | 20  | NO  | PEL | NO | NO  | NO  | 33         |
| LABRIDAE | Halichoeres      | poeyi          | TA  | 10764 | 20   | 24.1  | 14  | NO  | PEL | NO | YES | NO  | 33         |
| LABRIDAE | Halichoeres      | prosopeion     | ICP | 8957  | 13   | 21.2  | 38  | NO  | PEL | NO | NO  | NO  | 33         |
| LABRIDAE | Halichoeres      | radiatus       | TA  | 8198  | 51   | 24.55 | 53  | NO  | PEL | NO | YES | NO  | 33,PS      |
| LABRIDAE | Halichoeres      | richmondi      | ICP | 7380  | 19   | 20.8  | 28  | NO  | PEL | NO | NO  | NO  | 33         |
| LABRIDAE | Halichoeres      | scapularis     | ICP | 14900 | 20   | 24.4  | 8   | NO  | PEL | NO | YES | NO  | 33         |
| LABRIDAE | Halichoeres      | semicintus     | TEP | 1342  | 38   | 29.9  | 22  | NO  | PEL | NO | YES | NO  | 34         |
| LABRIDAE | Halichoeres      | trimaculatus   | ICP | 10700 | 27   | 26.8  | 28  | NO  | PEL | NO | YES | NO  | 33         |
| LABRIDAE | Hemigymnus       | fasciatus      | ICP | 20600 | 80   | 25.8  | 19  | NO  | PEL | NO | NO  | NO  | 33         |
| LABRIDAE | Hemigymnus       | melapterus     | ICP | 19500 | 90   | 23.9  | 29  | NO  | PEL | NO | NO  | NO  | 33         |
| LABRIDAE | Iniistius        | pavo           | ICP | 27891 | 41   | 60.16 | 99  | NO  | PEL | NO | YES | YES | 33         |
| LABRIDAE | Labrichthys      | unilineatus    | ICP | 15926 | 17.5 | 19.2  | 20  | NO  | PEL | NO | NO  | NO  | 33         |
| LABRIDAE | Labroides        | bicolor        | ICP | 17970 | 15   | 24.25 | 38  | NO  | PEL | NO | NO  | NO  | 2,33       |
| LABRIDAE | Labroides        | dimidiatus     | ICP | 17970 | 14   | 23.16 | 39  | NO  | PEL | NO | NO  | NO  | 2,33       |
| LABRIDAE | Labroides        | pectoralis     | ICP | 10700 | 11   | 26.8  | 26  | NO  | PEL | NO | NO  | NO  | 33         |
| LABRIDAE | Labroides        | phthirophagus  | ICP | 2100  | 12   | 32.1  | 90  | NO  | PEL | NO | NO  | NO  | 33         |
| LABRIDAE | Labropsis        | micronesica    | ICP | 3957  | 12   | 22    | 26  | NO  | PEL | NO | NO  | NO  | 33         |
| LABRIDAE | Labropsis        | xanthonota     | ICP | 15924 | 13   | 30.5  | 48  | NO  | PEL | NO | NO  | NO  | 33         |
| LABRIDAE | Lachnolaimus     | maximus        | TA  | 4091  | 91   | 25.8  | 27  | NO  | PEL | NO | YES | NO  | 33,PS      |
| LABRIDAE | Macropharyngodon | geoffroy       | ICP | 9500  | 15   | 32.3  | 26  | NO  | PEL | NO | YES | NO  | 33         |
| LABRIDAE | Macropharyngodon | meleagris      | ICP | 13454 | 15   | 27.5  | 30  | NO  | PEL | NO | YES | NO  | 2,33       |
| LABRIDAE | Macropharyngodon | negrosensis    | ICP | 10430 | 12   | 25    | 24  | NO  | PEL | NO | YES | NO  | 33         |
| LABRIDAE | Novaculichthys   | macrolepidotus | ICP | 13040 | 15   | 70.5  | 4   | NO  | PEL | NO | YES | NO  | 33         |
| LABRIDAE | Novaculichthys   | taeniourus     | ICP | 27631 | 30   | 55.1  | 22  | NO  | PEL | NO | YES | YES | 2,33,34,PS |
| LABRIDAE | Oxycheilinus     | bimaculatus    | ICP | 19580 | 15   | 50.5  | 108 | NO  | PEL | NO | YES | NO  | 33         |
| LABRIDAE | Oxycheilinus     | digamma        | ICP | 14920 | 30   | 26.1  | 47  | NO  | PEL | NO | NO  | NO  | 33         |
| LABRIDAE | Oxycheilinus     | unifasciatus   | ICP | 12500 | 46   | 36.2  | 159 | NO  | PEL | NO | NO  | NO  | 33         |
| LABRIDAE | Pseudocheilinus  | evanidus       | ICP | 19500 | 8    | 42.5  | 55  | NO  | PEL | NO | NO  | NO  | 33         |
| LABRIDAE | Pseudocheilinus  | hexataenia     | ICP | 19500 | 10   | 35    | 33  | NO  | PEL | NO | NO  | NO  | 33         |
| LABRIDAE | Pseudocheilinus  | octotaenia     | ICP | 18323 | 14   | 41.6  | 48  | NO  | PEL | NO | NO  | NO  | 33         |
| LABRIDAE | Pseudocheilinus  | tetrataenia    | ICP | 8842  | 7.5  | 49.3  | 38  | NO  | PEL | NO | NO  | NO  | 33         |
| LABRIDAE | Pseudojuloides   | cerasinus      | ICP | 18323 | 12.3 | 42.4  | 59  | NO  | PEL | NO | NO  | NO  | 33         |
| LABRIDAE | Pteragogus       | cryptus        | ICP | 17000 | 9.5  | 20.6  | 65  | NO  | PEL | NO | NO  | NO  | 33         |
| LABRIDAE | Pteragogus       | flagellifer    | ICP | 11900 | 20   | 23    | 23  | NO  | PEL | NO | NO  | NO  | 33         |
| LABRIDAE | Pteragogus       | guttatus       | ICP | 5881  | 9    | 20.5  | 23  | NO  | PEL | NO | NO  | NO  | 33         |
| LABRIDAE | Scarus           | coeruleus      | TA  | 3800  | 120  | 24    | 22  | NO  | PEL | NO | YES | NO  | PS*        |
| LABRIDAE | Scarus           | ghobban        | ICP | 27631 | 75   | 29.7  | 33  | NO  | PEL | NO | YES | YES | PS*        |
| LABRIDAE | Scarus           | iseri          | TA  | 4199  | 27   | 28.4  | 22  | YES | PEL | NO | YES | NO  | PS*        |
| LABRIDAE | Scarus           | rivulatus      | ICP | 8639  | 40   | 37    | 38  | YES | PEL | NO | NO  | NO  | 4          |
| LABRIDAE | Scarus           | schlegeli      | ICP | 11151 | 38   | 30.4  | 49  | YES | PEL | NO | NO  | NO  | PS*        |
| LABRIDAE | Scarus           | taeniopterus   | TA  | 4091  | 35   | 28.2  | 23  | NO  | PEL | NO | NO  | NO  | 35         |
| LABRIDAE | Semicossyphus    | darwini        | TEP | 2000  | 70   | 37    | 97  | NO  | PEL | NO | NO  | NO  | 34         |
| LABRIDAE | Semicossyphus    | pulcher        | TEP | 1893  | 90   | 37.4  | 55  | NO  | PEL | NO | YES | NO  | 34         |

|              |              |                 |     |       |      |        |     |     |     |     |     |     |          |
|--------------|--------------|-----------------|-----|-------|------|--------|-----|-----|-----|-----|-----|-----|----------|
| LABRIDAE     | Sparisoma    | atomarium       | TA  | 4199  | 15   | 18     | 35  | NO  | PEL | NO  | YES | NO  | PS*      |
| LABRIDAE     | Sparisoma    | aurofrenatum    | TA  | 4199  | 28   | 48.6   | 18  | NO  | PEL | NO  | YES | NO  | PS*      |
| LABRIDAE     | Sparisoma    | viride          | TA  | 4199  | 64   | 48.3   | 47  | NO  | PEL | NO  | NO  | NO  | PS*      |
| LABRIDAE     | Stethojulis  | balteata        | ICP | 2100  | 15   | 38.5   | 13  | NO  | PEL | NO  | NO  | NO  | 2,33     |
| LABRIDAE     | Stethojulis  | bandanensis     | ICP | 20210 | 15   | 30.7   | 27  | NO  | PEL | NO  | YES | YES | 33,34    |
| LABRIDAE     | Stethojulis  | notialis        | ICP | 1700  | 10   | 40.3   | 6   | NO  | PEL | NO  | NO  | NO  | PS*      |
| LABRIDAE     | Stethojulis  | strigiventer    | ICP | 17970 | 15   | 23.4   | 13  | NO  | PEL | NO  | NO  | NO  | 33       |
| LABRIDAE     | Thalassoma   | amblycephalum   | ICP | 16164 | 16   | 72.4   | 14  | NO  | PEL | NO  | NO  | NO  | 33       |
| LABRIDAE     | Thalassoma   | ballieui        | ICP | 2100  | 39.5 | 84     | 59  | NO  | PEL | NO  | NO  | NO  | 33       |
| LABRIDAE     | Thalassoma   | bifasciatum     | TA  | 4091  | 15   | 48.2   | 40  | NO  | PEL | NO  | YES | NO  | 3,33,PS  |
| LABRIDAE     | Thalassoma   | duperrey        | ICP | 2100  | 28   | 89.2   | 19  | NO  | PEL | NO  | NO  | NO  | 33       |
| LABRIDAE     | Thalassoma   | grammaticum     | TEP | 4530  | 32   | 61.8   | 39  | NO  | PEL | NO  | NO  | NO  | 34       |
| LABRIDAE     | Thalassoma   | hardwicke       | ICP | 17970 | 20   | 54.5   | 15  | NO  | PEL | NO  | NO  | NO  | 2,33,PS  |
| LABRIDAE     | Thalassoma   | janseni         | ICP | 8801  | 20   | 63.3   | 14  | NO  | PEL | NO  | NO  | NO  | 33       |
| LABRIDAE     | Thalassoma   | lucasanum       | TEP | 4093  | 15   | 72.25  | 64  | NO  | PEL | NO  | NO  | NO  | 33,34    |
| LABRIDAE     | Thalassoma   | lunare          | ICP | 20600 | 45   | 50.12  | 19  | NO  | PEL | NO  | NO  | NO  | 2,3,6,33 |
| LABRIDAE     | Thalassoma   | lutescens       | ICP | 17970 | 30   | 78     | 29  | NO  | PEL | NO  | NO  | NO  | 33       |
| LABRIDAE     | Thalassoma   | purpureum       | ICP | 27631 | 46   | 57.7   | 10  | NO  | PEL | NO  | NO  | YES | 34       |
| LABRIDAE     | Thalassoma   | quinquevittatum | ICP | 17970 | 17   | 56.4   | 40  | NO  | PEL | NO  | NO  | NO  | 33       |
| LABRIDAE     | Thalassoma   | robertsoni      | TEP | 7     | 7.8  | 58.6   | 47  | NO  | PEL | NO  | NO  | NO  | 34       |
| LABRIDAE     | Thalassoma   | trilobatum      | ICP | 19375 | 30   | 78.3   | 10  | NO  | PEL | NO  | NO  | NO  | 33       |
| LABRIDAE     | Thalassoma   | virens          | TEP | 1023  | 30   | 68.8   | 10  | NO  | PEL | NO  | NO  | NO  | 34       |
| LABRIDAE     | Xyrichtys    | martinicensis   | TA  | 10386 | 15   | 54.15  | 19  | NO  | PEL | NO  | YES | NO  | 33,PS    |
| LABRIDAE     | Xyrichtys    | mundiceps       | TEP | 4530  | 14.5 | 59.2   | 3   | NO  | PEL | NO  | YES | NO  | 34       |
| LABRIDAE     | Xyrichtys    | novacula        | TA  | 9258  | 38   | 39     | 89  | NO  | PEL | NO  | YES | NO  | 7,33,PS  |
| LABRIDAE     | Xyrichtys    | splendens       | TA  | 9790  | 17.5 | 72.1   | 12  | NO  | PEL | NO  | YES | NO  | 33,PS    |
| LABRIDAE     | Xyrichtys    | victori         | TEP | 400   | 15   | 73.7   | 20  | NO  | PEL | NO  | YES | NO  | 34       |
| LABRIDAE     | Xyrichtys    | wellingtoni     | TEP | 7     | 7.2  | 68     | 2   | NO  | PEL | NO  | YES | NO  | 34       |
| LABRISOMIDAE | Labrisomus   | nuchipinnis     | TA  | 11294 | 22   | 25     | 10  | NO  | DEM | NO  | YES | NO  | PS*      |
| LABRISOMIDAE | Malacoctenus | hubbsi          | TEP | 1410  | 9    | 24     | 3   | NO  | DEM | NO  | NO  | NO  | 12       |
| LABRISOMIDAE | Malacoctenus | macropus        | TA  | 2967  | 5.2  | 21.375 | 8   | NO  | DEM | NO  | YES | NO  | PS*      |
| LABRISOMIDAE | Paraclinus   | nigripinnis     | TA  | 2967  | 5    | 18.75  | 10  | NO  | DEM | NO  | YES | NO  | PS*      |
| LABRISOMIDAE | Starksia     | ocellata        | TA  | 2806  | 6    | 19     | 18  | NO  | DEM | NO  | NO  | NO  | PS*      |
| LETHRINIDAE  | Gnathodentex | aureolineatus   | ICP | 20329 | 30   | 40     | 27  | YES | PEL | YES | YES | NO  | PS*      |
| LETHRINIDAE  | Lethrinus    | atkinsoni       | ICP | 12157 | 40   | 26.6   | 23  | NO  | PEL | YES | YES | NO  | 9        |
| LETHRINIDAE  | Lethrinus    | genivittatus    | ICP | 7290  | 25   | 29.05  | 20  | NO  | PEL | NO  | YES | NO  | 9,PS     |
| LETHRINIDAE  | Lethrinus    | harak           | ICP | 17390 | 50   | 28     | 18  | NO  | PEL | NO  | YES | NO  | 9        |
| LETHRINIDAE  | Lethrinus    | nebulosus       | ICP | 17000 | 86   | 32.7   | 65  | YES | PEL | YES | YES | NO  | 6,9      |
| LETHRINIDAE  | Lethrinus    | obsoletus       | ICP | 17390 | 50   | 25.7   | 28  | NO  | PEL | YES | YES | NO  | 9        |
| LETHRINIDAE  | Lethrinus    | olivaceus       | ICP | 17390 | 100  | 30     | 184 | NO  | PEL | NO  | YES | NO  | 9        |
| LETHRINIDAE  | Lethrinus    | ornatus         | ICP | 7884  | 40   | 26.6   | 29  | NO  | PEL | YES | YES | NO  | 9        |
| LETHRINIDAE  | Lethrinus    | variegatus      | ICP | 15033 | 20   | 32     | 149 | YES | PEL | NO  | YES | NO  | PS*      |
| LETHRINIDAE  | Lethrinus    | xanthochilus    | ICP | 19500 | 70   | 26.65  | 149 | NO  | PEL | NO  | YES | NO  | 3        |
| LETHRINIDAE  | Monotaxis    | grandoculis     | ICP | 20629 | 60   | 33.3   | 99  | NO  | PEL | YES | YES | NO  | PS*      |
| LUTJANIDAE   | Hoplopagrus  | guentherii      | TEP | 4497  | 92   | 21.5   | 50  | NO  | PEL | NO  | YES | NO  | 36       |
| LUTJANIDAE   | Lutjanus     | analis          | TA  | 10861 | 94   | 31     | 70  | NO  | PEL | NO  | YES | NO  | 31       |
| LUTJANIDAE   | Lutjanus     | apodus          | TA  | 4199  | 67   | 32     | 61  | YES | PEL | NO  | YES | NO  | 31       |
| LUTJANIDAE   | Lutjanus     | argentiventris  | TEP | 7500  | 71   | 22.9   | 57  | NO  | PEL | NO  | YES | NO  | 37       |
| LUTJANIDAE   | Lutjanus     | buccanella      | TA  | 10002 | 75   | 26     | 180 | NO  | PEL | NO  | YES | NO  | PS*      |
| LUTJANIDAE   | Lutjanus     | campechanus     | TA  | 2876  | 100  | 28     | 180 | NO  | PEL | NO  | YES | NO  | 38       |
| LUTJANIDAE   | Lutjanus     | carponotatus    | ICP | 7884  | 40   | 35     | 78  | YES | PEL | NO  | NO  | NO  | 39       |
| LUTJANIDAE   | Lutjanus     | cyanopterus     | TA  | 10861 | 160  | 29     | 78  | NO  | PEL | NO  | YES | NO  | 40       |
| LUTJANIDAE   | Lutjanus     | decussatus      | ICP | 7884  | 30   | 32.3   | 30  | NO  | PEL | NO  | NO  | NO  | 9        |
| LUTJANIDAE   | Lutjanus     | fulviflamma     | ICP | 17000 | 35   | 23.26  | 32  | YES | PEL | NO  | YES | NO  | 3,9      |
| LUTJANIDAE   | Lutjanus     | fulvus          | ICP | 19840 | 40   | 27.7   | 74  | NO  | PEL | NO  | YES | NO  | PS*      |
| LUTJANIDAE   | Lutjanus     | gibbus          | ICP | 19500 | 50   | 54     | 149 | YES | PEL | NO  | YES | NO  | 3        |
| LUTJANIDAE   | Lutjanus     | griseus         | TA  | 4199  | 66   | 32.4   | 175 | YES | PEL | NO  | YES | NO  | 31,41    |

|                 |                 |                 |     |       |      |       |     |     |     |     |     |     |       |
|-----------------|-----------------|-----------------|-----|-------|------|-------|-----|-----|-----|-----|-----|-----|-------|
| LUTJANIDAE      | Lutjanus        | guttatus        | TEP | 7175  | 80   | 24.15 | 29  | YES | PEL | NO  | YES | NO  | 36    |
| LUTJANIDAE      | Lutjanus        | kasmira         | ICP | 19500 | 40   | 31    | 262 | YES | PEL | NO  | YES | NO  | PS*   |
| LUTJANIDAE      | Lutjanus        | novemfasciatus  | TEP | 5397  | 170  | 21.75 | 59  | NO  | PEL | NO  | YES | NO  | 36    |
| LUTJANIDAE      | Lutjanus        | sebae           | ICP | 13040 | 100  | 40    | 175 | NO  | PEL | NO  | YES | NO  | 2     |
| LUTJANIDAE      | Lutjanus        | synagris        | TA  | 10861 | 71   | 23.87 | 390 | YES | PEL | NO  | YES | NO  | 31,PS |
| LUTJANIDAE      | Lutjanus        | viridis         | TEP | 5189  | 30   | 37.9  | 27  | YES | PEL | NO  | YES | NO  | 36    |
| LUTJANIDAE      | Lutjanus        | vitta           | ICP | 9979  | 40   | 31.3  | 62  | YES | PEL | NO  | NO  | NO  | PS*   |
| LUTJANIDAE      | Ocyurus         | chrysurus       | TA  | 10861 | 86   | 30.9  | 180 | YES | PEL | NO  | YES | NO  | 31,PS |
| LUTJANIDAE      | Pristipomoides  | filamentosus    | ICP | 19458 | 100  | 45    | 360 | NO  | PEL | NO  | NO  | NO  | 14    |
| MALACANTHIDAE   | Hoplostethus    | purpureus       | ICP | 4848  | 12   | 34    | 62  | NO  | PEL | NO  | YES | NO  | 2     |
| MONACANTHIDAE   | Acreichthys     | tomentosus      | ICP | 9979  | 11.5 | 23.9  | 13  | NO  | PEL | NO  | YES | NO  | PS*   |
| MONACANTHIDAE   | Monacanthus     | chinensis       | ICP | 8957  | 38   | 20    | 9   | NO  | PEL | NO  | YES | NO  | 6     |
| MONACANTHIDAE   | Monacanthus     | tuckeri         | TA  | 4199  | 9    | 41.9  | 48  | NO  | PEL | NO  | YES | NO  | 42    |
| MONACANTHIDAE   | Paraluteres     | prionurus       | ICP | 13330 | 11   | 28    | 24  | NO  | PEL | NO  | NO  | NO  | 6     |
| MULLIDAE        | Mulloidichthys  | flavolineatus   | ICP | 21500 | 40   | 60.1  | 30  | YES | PEL | NO  | YES | NO  | PS*   |
| MULLIDAE        | Mulloidichthys  | vanicolensis    | ICP | 27631 | 38   | 36.3  | 108 | YES | PEL | NO  | YES | YES | PS*   |
| MULLIDAE        | Parupeneus      | barbarinoides   | ICP | 9792  | 25   | 42.3  | 14  | NO  | PEL | NO  | YES | NO  | 9     |
| MULLIDAE        | Parupeneus      | barberinus      | ICP | 18470 | 60   | 38.6  | 99  | NO  | PEL | NO  | YES | NO  | 3,PS  |
| MULLIDAE        | Parupeneus      | indicus         | ICP | 16219 | 35   | 33    | 112 | YES | PEL | NO  | YES | NO  | 9     |
| MULLIDAE        | Parupeneus      | multifasciatus  | ICP | 11600 | 35   | 45    | 139 | NO  | PEL | NO  | YES | NO  | 3,PS  |
| MULLIDAE        | Parupeneus      | pleurostigma    | ICP | 19375 | 33   | 50    | 37  | NO  | PEL | NO  | YES | NO  | 3,PS  |
| MULLIDAE        | Upeneus         | tragula         | ICP | 15033 | 33   | 31.1  | 24  | YES | PEL | NO  | YES | NO  | 43    |
| MURAENIDAE      | Echidna         | nebulosa        | ICP | 27631 | 75   | 80    | 47  | NO  | PEL | YES | NO  | YES | 2     |
| MURAENIDAE      | Rhinomuraena    | quaesita        | ICP | 18566 | 130  | 71    | 56  | NO  | PEL | YES | YES | NO  | 2     |
| NEMIPTERIDAE    | Scolopsis       | bilineata       | ICP | 11737 | 25   | 25    | 24  | NO  | PEL | NO  | NO  | NO  | PS*   |
| NEMIPTERIDAE    | Scolopsis       | taenioptera     | ICP | 7100  | 30   | 19    | 49  | NO  | PEL | NO  | YES | NO  | 6     |
| OPISTOGNATHIDAE | Opistognathus   | whitehursti     | TA  | 9294  | 7.8  | 26.5  | 11  | NO  | DEM | YES | YES | NO  | PS*   |
| OSTRACIIDAE     | Lactoria        | cornuta         | ICP | 20629 | 46   | 58    | 82  | NO  | PEL | NO  | YES | NO  | PS*   |
| OSTRACIIDAE     | Ostracion       | cubicus         | ICP | 20629 | 15   | 44.3  | 279 | NO  | PEL | NO  | NO  | NO  | PS*   |
| OSTRACIIDAE     | Ostracion       | meleagris       | ICP | 27631 | 25   | 61.5  | 29  | NO  | PEL | NO  | NO  | YES | 2     |
| PINGUIPEDIDAE   | Parapercis      | australis       | ICP | 3891  | 9.2  | 41.6  | 3   | NO  | PEL | NO  | NO  | NO  | PS*   |
| POMACANTHIDAE   | Apolemichthys   | trimaculatus    | ICP | 15924 | 26   | 24.2  | 37  | NO  | PEL | NO  | NO  | NO  | 44    |
| POMACANTHIDAE   | Centropyge      | acanthops       | ICP | 4186  | 8    | 34    | 34  | NO  | PEL | NO  | NO  | NO  | 44    |
| POMACANTHIDAE   | Centropyge      | argi            | TA  | 4199  | 8    | 36.8  | 75  | NO  | PEL | NO  | YES | NO  | 45    |
| POMACANTHIDAE   | Centropyge      | bicolor         | ICP | 8957  | 15   | 32    | 24  | NO  | PEL | NO  | NO  | NO  | 44    |
| POMACANTHIDAE   | Centropyge      | bispinosa       | ICP | 17970 | 10   | 32    | 36  | NO  | PEL | NO  | NO  | NO  | 44    |
| POMACANTHIDAE   | Centropyge      | eibli           | ICP | 5216  | 15   | 25.3  | 20  | NO  | PEL | NO  | NO  | NO  | 44    |
| POMACANTHIDAE   | Centropyge      | ferrugata       | ICP | 1983  | 10   | 38    | 24  | NO  | PEL | NO  | YES | NO  | 44    |
| POMACANTHIDAE   | Centropyge      | fisheri         | ICP | 19458 | 7.5  | 38.33 | 85  | NO  | PEL | NO  | YES | NO  | 44    |
| POMACANTHIDAE   | Centropyge      | flavissima      | ICP | 11915 | 14   | 30.3  | 47  | NO  | PEL | NO  | NO  | NO  | 44,PS |
| POMACANTHIDAE   | Centropyge      | heraldi         | ICP | 10000 | 10   | 32    | 85  | NO  | PEL | NO  | NO  | NO  | 44    |
| POMACANTHIDAE   | Centropyge      | interruptus     | ICP | 7846  | 15   | 31.5  | 48  | NO  | PEL | NO  | NO  | NO  | 44    |
| POMACANTHIDAE   | Centropyge      | loricula        | ICP | 7958  | 15   | 38    | 45  | NO  | PEL | NO  | NO  | NO  | 44    |
| POMACANTHIDAE   | Centropyge      | multifasciata   | ICP | 11939 | 12   | 26.2  | 63  | NO  | PEL | NO  | NO  | NO  | 44    |
| POMACANTHIDAE   | Centropyge      | nox             | ICP | 6849  | 10   | 31.5  | 67  | NO  | PEL | NO  | NO  | NO  | 44    |
| POMACANTHIDAE   | Centropyge      | potteri         | ICP | 2100  | 10   | 35.5  | 133 | NO  | PEL | NO  | NO  | NO  | 44    |
| POMACANTHIDAE   | Centropyge      | tibicen         | ICP | 6773  | 19   | 30    | 51  | NO  | PEL | NO  | NO  | NO  | 44    |
| POMACANTHIDAE   | Centropyge      | venusta         | ICP | 2600  | 12   | 25    | 30  | NO  | PEL | NO  | NO  | NO  | 44    |
| POMACANTHIDAE   | Centropyge      | vroliki         | ICP | 6944  | 12   | 29    | 22  | NO  | PEL | NO  | NO  | NO  | 44    |
| POMACANTHIDAE   | Chaetodontoplus | duboulayi       | ICP | 2600  | 28   | 21.64 | 19  | NO  | PEL | NO  | YES | NO  | 44    |
| POMACANTHIDAE   | Chaetodontoplus | melanosoma      | ICP | 4356  | 20   | 22.2  | 20  | NO  | PEL | NO  | NO  | NO  | 44    |
| POMACANTHIDAE   | Chaetodontoplus | mesoleucus      | ICP | 7468  | 18   | 19.9  | 19  | NO  | PEL | NO  | NO  | NO  | 44    |
| POMACANTHIDAE   | Chaetodontoplus | personifer      | ICP | 2863  | 35   | 23.2  | 29  | NO  | PEL | NO  | YES | NO  | 44    |
| POMACANTHIDAE   | Chaetodontoplus | septentrionalis | ICP | 2557  | 22   | 23    | 10  | NO  | PEL | NO  | NO  | NO  | 44    |
| POMACANTHIDAE   | Genicanthus     | bellus          | ICP | 10600 | 18   | 25    | 76  | YES | PEL | NO  | NO  | NO  | 44    |
| POMACANTHIDAE   | Genicanthus     | melanospilos    | ICP | 8967  | 18   | 25    | 25  | NO  | PEL | NO  | NO  | NO  | 44    |
| POMACANTHIDAE   | Holacanthus     | bermudensis     | TA  | 3273  | 45   | 22.7  | 90  | NO  | PEL | NO  | NO  | NO  | 45,PS |



|               |                  |                |     |       |     |       |     |     |     |    |     |    |                  |
|---------------|------------------|----------------|-----|-------|-----|-------|-----|-----|-----|----|-----|----|------------------|
| POMACANTHIDAE | Holacanthus      | ciliaris       | TA  | 10861 | 45  | 22.4  | 69  | NO  | PEL | NO | NO  | NO | 45               |
| POMACANTHIDAE | Holacanthus      | tricolor       | TA  | 10861 | 25  | 29.7  | 89  | NO  | PEL | NO | NO  | NO | 45               |
| POMACANTHIDAE | Pomacanthus      | annularis      | ICP | 13242 | 45  | 21    | 28  | NO  | PEL | NO | NO  | NO | 44               |
| POMACANTHIDAE | Pomacanthus      | arcuatus       | TA  | 10861 | 60  | 19.9  | 28  | NO  | PEL | NO | YES | NO | 45,PS            |
| POMACANTHIDAE | Pomacanthus      | imperator      | ICP | 19500 | 40  | 22    | 99  | NO  | PEL | NO | NO  | NO | 44               |
| POMACANTHIDAE | Pomacanthus      | navarchus      | ICP | 6500  | 25  | 22.83 | 37  | NO  | PEL | NO | NO  | NO | 44               |
| POMACANTHIDAE | Pomacanthus      | paru           | TA  | 10861 | 40  | 17.7  | 97  | NO  | PEL | NO | YES | NO | 45               |
| POMACANTHIDAE | Pomacanthus      | semicirculatus | ICP | 14920 | 40  | 19.5  | 29  | NO  | PEL | NO | NO  | NO | 44               |
| POMACANTHIDAE | Pomacanthus      | sexstriatus    | ICP | 7656  | 46  | 18    | 47  | NO  | PEL | NO | NO  | NO | 44               |
| POMACANTHIDAE | Pomacanthus      | xanthometopon  | ICP | 10869 | 38  | 20.38 | 20  | NO  | PEL | NO | NO  | NO | 44               |
| POMACANTHIDAE | Pygoplites       | diacanthus     | ICP | 19500 | 25  | 24.5  | 47  | NO  | PEL | NO | NO  | NO | 44               |
| POMACENTRIDAE | Abudefduf        | abdominalis    | ICP | 5625  | 30  | 20.85 | 49  | YES | DEM | NO | NO  | NO | 46,47            |
| POMACENTRIDAE | Abudefduf        | bengalensis    | ICP | 10500 | 17  | 22.8  | 5   | YES | DEM | NO | NO  | NO | 46               |
| POMACENTRIDAE | Abudefduf        | concolor       | TEP | 3000  | 19  | 20.85 | 12  | NO  | DEM | NO | NO  | NO | 34,47            |
| POMACENTRIDAE | Abudefduf        | declivifrons   | TEP | 2000  | 18  | 21.9  | 4   | NO  | DEM | NO | NO  | NO | 34               |
| POMACENTRIDAE | Abudefduf        | lorenzi        | ICP | 5500  | 18  | 23    | 5   | YES | DEM | NO | NO  | NO | 46               |
| POMACENTRIDAE | Abudefduf        | saxatilis      | TA  | 11294 | 23  | 23.5  | 20  | YES | DEM | NO | NO  | NO | 47,PS            |
| POMACENTRIDAE | Abudefduf        | sexfasciatus   | ICP | 20000 | 19  | 19.4  | 19  | YES | DEM | NO | NO  | NO | 46,47            |
| POMACENTRIDAE | Abudefduf        | sordidus       | ICP | 20000 | 23  | 26.1  | 3   | YES | DEM | NO | NO  | NO | 47               |
| POMACENTRIDAE | Abudefduf        | taurus         | TA  | 11294 | 25  | 24.45 | 4   | NO  | DEM | NO | NO  | NO | 45,47            |
| POMACENTRIDAE | Abudefduf        | troschelii     | TEP | 6000  | 18  | 18.1  | 11  | YES | DEM | NO | NO  | NO | 47               |
| POMACENTRIDAE | Abudefduf        | vaigiensis     | ICP | 19500 | 15  | 21.13 | 14  | YES | DEM | NO | NO  | NO | 46,47            |
| POMACENTRIDAE | Abudefduf        | whitleyi       | ICP | 2800  | 19  | 18.3  | 4   | NO  | DEM | NO | NO  | NO | 46               |
| POMACENTRIDAE | Acanthochromis   | polyacanthus   | ICP | 5718  | 14  | 1     | 64  | YES | DEM | NO | NO  | NO | 15,46            |
| POMACENTRIDAE | Amblyglyphidodon | aureus         | ICP | 8600  | 13  | 16.5  | 42  | NO  | DEM | NO | NO  | NO | 20,47            |
| POMACENTRIDAE | Amblyglyphidodon | curacao        | ICP | 7400  | 11  | 15.68 | 39  | NO  | DEM | NO | NO  | NO | 20,46,47         |
| POMACENTRIDAE | Amblyglyphidodon | leucogaster    | ICP | 10450 | 13  | 16.35 | 43  | NO  | DEM | NO | NO  | NO | 46,47            |
| POMACENTRIDAE | Amblyglyphidodon | ternatensis    | ICP | 5500  | 10  | 20    | 14  | NO  | DEM | NO | NO  | NO | 47               |
| POMACENTRIDAE | Amphiprion       | akindynos      | ICP | 2770  | 9   | 12.4  | 24  | NO  | DEM | NO | NO  | NO | 20,46            |
| POMACENTRIDAE | Amphiprion       | chrysopterus   | ICP | 8900  | 17  | 17    | 29  | NO  | DEM | NO | NO  | NO | 47               |
| POMACENTRIDAE | Amphiprion       | clarkii        | ICP | 14268 | 15  | 12.15 | 59  | NO  | DEM | NO | NO  | NO | 46,47            |
| POMACENTRIDAE | Amphiprion       | melanopus      | ICP | 10275 | 12  | 12.4  | 17  | NO  | DEM | NO | NO  | NO | 5,15,20,46,47,48 |
| POMACENTRIDAE | Amphiprion       | percula        | ICP | 2600  | 11  | 10.8  | 14  | NO  | DEM | NO | NO  | NO | 19,46            |
| POMACENTRIDAE | Amphiprion       | perideraion    | ICP | 7220  | 10  | 14.3  | 37  | NO  | DEM | NO | NO  | NO | 46,47            |
| POMACENTRIDAE | Amphiprion       | polymnus       | ICP | 6200  | 13  | 11    | 28  | NO  | DEM | NO | NO  | NO | 46               |
| POMACENTRIDAE | Amphiprion       | tricinctus     | ICP | 1200  | 12  | 10.1  | 37  | NO  | DEM | NO | NO  | NO | 46               |
| POMACENTRIDAE | Cheiloprion      | labiatus       | ICP | 7900  | 6   | 16.5  | 2   | NO  | DEM | NO | NO  | NO | 47               |
| POMACENTRIDAE | Chromis          | agilis         | ICP | 19375 | 8   | 32.7  | 62  | YES | DEM | NO | NO  | NO | 47               |
| POMACENTRIDAE | Chromis          | alpha          | ICP | 11600 | 8   | 30    | 83  | YES | DEM | NO | NO  | NO | 47               |
| POMACENTRIDAE | Chromis          | alta           | TEP | 4150  | 13  | 18.7  | 120 | YES | DEM | NO | NO  | NO | 47               |
| POMACENTRIDAE | Chromis          | amboinensis    | ICP | 6167  | 9   | 22.1  | 65  | YES | DEM | NO | NO  | NO | 46               |
| POMACENTRIDAE | Chromis          | atrilobata     | TEP | 6000  | 12  | 30.95 | 74  | YES | DEM | NO | NO  | NO | 34,47            |
| POMACENTRIDAE | Chromis          | atripectoralis | ICP | 19000 | 12  | 19    | 28  | YES | DEM | NO | NO  | NO | 2,15,20,46,PS    |
| POMACENTRIDAE | Chromis          | atripes        | ICP | 7400  | 9   | 30    | 38  | YES | DEM | NO | NO  | NO | 46,47            |
| POMACENTRIDAE | Chromis          | caerulea       | ICP | 19458 | 6.5 | 26    | 11  | YES | DEM | NO | NO  | NO | 2                |
| POMACENTRIDAE | Chromis          | caudalis       | ICP | 10680 | 8   | 27    | 40  | YES | DEM | NO | NO  | NO | 47               |
| POMACENTRIDAE | Chromis          | chrysur        | ICP | 12300 | 14  | 23.2  | 39  | YES | DEM | NO | NO  | NO | 46               |
| POMACENTRIDAE | Chromis          | cyanea         | TA  | 4199  | 15  | 29.9  | 57  | YES | DEM | NO | NO  | NO | 47               |
| POMACENTRIDAE | Chromis          | delta          | ICP | 7959  | 7   | 24    | 70  | NO  | DEM | NO | NO  | NO | 47               |
| POMACENTRIDAE | Chromis          | hanui          | ICP | 2100  | 6   | 27    | 44  | NO  | DEM | NO | NO  | NO | 47               |
| POMACENTRIDAE | Chromis          | insolata       | TA  | 4199  | 16  | 25.75 | 80  | NO  | DEM | NO | NO  | NO | 47               |
| POMACENTRIDAE | Chromis          | iomelas        | ICP | 3890  | 8   | 24.4  | 32  | NO  | DEM | NO | NO  | NO | 46               |
| POMACENTRIDAE | Chromis          | lepidolepis    | ICP | 20600 | 9   | 31.5  | 41  | YES | DEM | NO | NO  | NO | 46,47            |
| POMACENTRIDAE | Chromis          | limbaughi      | TEP | 1000  | 10  | 23.5  | 71  | NO  | DEM | NO | NO  | NO | 34,47            |
| POMACENTRIDAE | Chromis          | lineata        | ICP | 20600 | 7   | 33.75 | 33  | YES | DEM | NO | NO  | NO | 46,47            |
| POMACENTRIDAE | Chromis          | margaritifer   | ICP | 12196 | 9   | 31.8  | 18  | YES | DEM | NO | NO  | NO | 46,47            |
| POMACENTRIDAE | Chromis          | multilineata   | TA  | 11294 | 20  | 28.16 | 60  | YES | DEM | NO | NO  | NO | 2,47             |

|               |                    |                      |     |       |      |       |     |     |     |    |     |    |                |
|---------------|--------------------|----------------------|-----|-------|------|-------|-----|-----|-----|----|-----|----|----------------|
| POMACENTRIDAE | Chromis            | notata               | ICP | 1948  | 17   | 40    | 13  | NO  | DEM | NO | NO  | NO | 16             |
| POMACENTRIDAE | Chromis            | retrofasciata        | ICP | 5330  | 4    | 21.45 | 62  | NO  | DEM | NO | NO  | NO | 46,47          |
| POMACENTRIDAE | Chromis            | ternatensis          | ICP | 15850 | 10   | 28.5  | 34  | YES | DEM | NO | NO  | NO | 46,47          |
| POMACENTRIDAE | Chromis            | vanderbilti          | ICP | 10115 | 4.5  | 33.55 | 18  | YES | DEM | NO | NO  | NO | 46,47          |
| POMACENTRIDAE | Chromis            | viridis              | ICP | 20000 | 8    | 23.97 | 2   | YES | DEM | NO | NO  | NO | 2,20,46,47     |
| POMACENTRIDAE | Chromis            | weberi               | ICP | 21650 | 14   | 31.2  | 7   | YES | DEM | NO | NO  | NO | 47             |
| POMACENTRIDAE | Chromis            | xanthura             | ICP | 13467 | 15   | 28.2  | 37  | YES | DEM | NO | NO  | NO | 47             |
| POMACENTRIDAE | Chrysiptera        | biocellata           | ICP | 15924 | 12   | 18.4  | 5   | NO  | DEM | NO | NO  | NO | 2,46,47        |
| POMACENTRIDAE | Chrysiptera        | brownriggii          | ICP | 17480 | 8    | 22.13 | 12  | NO  | DEM | NO | NO  | NO | 46,47,PS       |
| POMACENTRIDAE | Chrysiptera        | cyanea               | ICP | 7330  | 8    | 17.43 | 10  | NO  | DEM | NO | NO  | NO | 2,46,47        |
| POMACENTRIDAE | Chrysiptera        | flavipinnis          | ICP | 2300  | 8    | 19    | 35  | NO  | DEM | NO | YES | NO | 46             |
| POMACENTRIDAE | Chrysiptera        | galba                | ICP | 3068  | 7    | 23.5  | 29  | NO  | DEM | NO | NO  | NO | PS*            |
| POMACENTRIDAE | Chrysiptera        | glauca               | ICP | 19960 | 10   | 23.5  | 3   | YES | DEM | NO | YES | NO | 46,PS          |
| POMACENTRIDAE | Chrysiptera        | hemicyanea           | ICP | 2740  | 7    | 19.3  | 37  | NO  | DEM | NO | NO  | NO | 2,46           |
| POMACENTRIDAE | Chrysiptera        | oxycephala           | ICP | 5023  | 9    | 21.5  | 15  | NO  | DEM | NO | NO  | NO | 47             |
| POMACENTRIDAE | Chrysiptera        | rex                  | ICP | 6200  | 7    | 19.78 | 19  | NO  | DEM | NO | NO  | NO | 2,20,46,47     |
| POMACENTRIDAE | Chrysiptera        | rollandi             | ICP | 7470  | 8    | 19.76 | 33  | NO  | DEM | NO | NO  | NO | 2,6,20,46,47   |
| POMACENTRIDAE | Chrysiptera        | talboti              | ICP | 9900  | 6    | 22    | 32  | NO  | DEM | NO | NO  | NO | 6              |
| POMACENTRIDAE | Chrysiptera        | traceyi              | ICP | 4500  | 4    | 23    | 35  | NO  | DEM | NO | NO  | NO | 47             |
| POMACENTRIDAE | Chrysiptera        | tricincta            | ICP | 7876  | 6    | 19.4  | 28  | NO  | DEM | NO | YES | NO | 9              |
| POMACENTRIDAE | Dascyllus          | albisella            | ICP | 2100  | 13   | 25.9  | 49  | YES | DEM | NO | NO  | NO | 46,47          |
| POMACENTRIDAE | Dascyllus          | aruanus              | ICP | 19500 | 10   | 21.1  | 20  | YES | DEM | NO | NO  | NO | 6,46,47,PS     |
| POMACENTRIDAE | Dascyllus          | flavicaudus          | ICP | 2208  | 11   | 27.7  | 37  | YES | DEM | NO | NO  | NO | PS*            |
| POMACENTRIDAE | Dascyllus          | melanurus            | ICP | 3850  | 8    | 22.25 | 67  | YES | DEM | NO | NO  | NO | 46,47          |
| POMACENTRIDAE | Dascyllus          | reticulatus          | ICP | 11350 | 9    | 22.7  | 49  | YES | DEM | NO | NO  | NO | 2,46,47        |
| POMACENTRIDAE | Dascyllus          | trimaculatus         | ICP | 18700 | 11   | 28    | 54  | YES | DEM | NO | NO  | NO | 46,47,PS       |
| POMACENTRIDAE | Dischistodus       | chrysopoecilus       | ICP | 6200  | 15   | 19.5  | 4   | NO  | DEM | NO | YES | NO | 47             |
| POMACENTRIDAE | Dischistodus       | melanotus            | ICP | 6200  | 16   | 14.85 | 11  | NO  | DEM | NO | YES | NO | 46,47          |
| POMACENTRIDAE | Dischistodus       | perspicillatus       | ICP | 8600  | 18   | 14.9  | 9   | NO  | DEM | NO | YES | NO | 46,47          |
| POMACENTRIDAE | Dischistodus       | prosopotaenia        | ICP | 6814  | 18.5 | 23.5  | 11  | NO  | DEM | NO | YES | NO | 9              |
| POMACENTRIDAE | Dischistodus       | pseudochrysopoecilus | ICP | 7420  | 18   | 17.6  | 4   | NO  | DEM | NO | YES | NO | 6,46,47        |
| POMACENTRIDAE | Hemiglyphidodon    | plagiometopon        | ICP | 7170  | 18   | 18    | 19  | NO  | DEM | NO | NO  | NO | 47             |
| POMACENTRIDAE | Lepidozygus        | tapeinosoma          | ICP | 17800 | 10   | 19.35 | 29  | YES | DEM | NO | NO  | NO | 46             |
| POMACENTRIDAE | Microspathodon     | bairdii              | TEP | 5148  | 30   | 25.9  | 5   | NO  | DEM | NO | NO  | NO | 34             |
| POMACENTRIDAE | Microspathodon     | chrysurus            | TA  | 9391  | 21   | 25.85 | 120 | NO  | DEM | NO | NO  | NO | 45,47          |
| POMACENTRIDAE | Microspathodon     | dorsalis             | TEP | 5148  | 31   | 31.45 | 4   | NO  | DEM | NO | NO  | NO | 34,47          |
| POMACENTRIDAE | Neoglyphidodon     | melas                | ICP | 14930 | 18   | 15.45 | 11  | NO  | DEM | NO | NO  | NO | 46,47          |
| POMACENTRIDAE | Neoglyphidodon     | nigroris             | ICP | 8480  | 13   | 18.8  | 21  | NO  | DEM | NO | NO  | NO | 6,46,47        |
| POMACENTRIDAE | Neopomacentrus     | azyrsron             | ICP | 14500 | 8    | 22    | 11  | YES | DEM | NO | NO  | NO | 6,46           |
| POMACENTRIDAE | Neopomacentrus     | bankieri             | ICP | 5574  | 6.5  | 21    | 9   | YES | DEM | NO | NO  | NO | 5              |
| POMACENTRIDAE | Neopomacentrus     | cyanomos             | ICP | 14800 | 10   | 17.5  | 25  | YES | DEM | NO | NO  | NO | 46             |
| POMACENTRIDAE | Neopomacentrus     | filamentosus         | ICP | 7170  | 11   | 20    | 7   | NO  | DEM | NO | YES | NO | 46             |
| POMACENTRIDAE | Neopomacentrus     | nemurus              | ICP | 5980  | 8    | 19.2  | 9   | NO  | DEM | NO | NO  | NO | 47             |
| POMACENTRIDAE | Nexilosus          | latifrons            | TEP | 2964  | 30   | 29.2  | 9   | NO  | DEM | NO | NO  | NO | 34             |
| POMACENTRIDAE | Plectroglyphidodon | dickii               | ICP | 17127 | 11   | 26.6  | 14  | NO  | DEM | NO | NO  | NO | 47             |
| POMACENTRIDAE | Plectroglyphidodon | imparipennis         | ICP | 17480 | 6    | 29.7  | 6   | NO  | DEM | NO | NO  | NO | 47             |
| POMACENTRIDAE | Plectroglyphidodon | johnstonianus        | ICP | 19960 | 14   | 31.7  | 17  | NO  | DEM | NO | NO  | NO | 46             |
| POMACENTRIDAE | Plectroglyphidodon | lacrymatus           | ICP | 17127 | 10   | 22.35 | 39  | NO  | DEM | NO | NO  | NO | 46,47          |
| POMACENTRIDAE | Plectroglyphidodon | sindonis             | ICP | 2100  | 10   | 30    | 3   | NO  | DEM | NO | NO  | NO | 47             |
| POMACENTRIDAE | Pomacentrus        | alexanderae          | ICP | 4300  | 9    | 20.65 | 55  | NO  | DEM | NO | NO  | NO | 47             |
| POMACENTRIDAE | Pomacentrus        | amboinensis          | ICP | 8400  | 9    | 20.14 | 38  | YES | DEM | NO | YES | NO | 2,5,6,20,46,47 |
| POMACENTRIDAE | Pomacentrus        | australis            | ICP | 1498  | 8    | 25    | 30  | NO  | DEM | NO | YES | NO | 46             |
| POMACENTRIDAE | Pomacentrus        | bankanensis          | ICP | 9770  | 9    | 18.4  | 12  | NO  | DEM | NO | NO  | NO | 46,47          |
| POMACENTRIDAE | Pomacentrus        | brachialis           | ICP | 8000  | 8    | 18    | 34  | YES | DEM | NO | NO  | NO | 46,47          |
| POMACENTRIDAE | Pomacentrus        | burroughi            | ICP | 6200  | 8    | 16.8  | 14  | NO  | DEM | NO | NO  | NO | 47             |
| POMACENTRIDAE | Pomacentrus        | chrysurus            | ICP | 10390 | 9    | 17    | 3   | NO  | DEM | NO | YES | NO | 46,47          |
| POMACENTRIDAE | Pomacentrus        | coelestis            | ICP | 14320 | 9    | 17.82 | 19  | YES | DEM | NO | NO  | NO | 2,45,46,47     |

|                |                   |                 |     |       |      |       |     |     |     |     |     |    |                    |
|----------------|-------------------|-----------------|-----|-------|------|-------|-----|-----|-----|-----|-----|----|--------------------|
| POMACENTRIDAE  | Pomacentrus       | emarginatus     | ICP | 1160  | 9    | 18.4  | 8   | NO  | DEM | NO  | NO  | NO | 47                 |
| POMACENTRIDAE  | Pomacentrus       | grammorhynchus  | ICP | 6200  | 9    | 16.4  | 10  | NO  | DEM | NO  | NO  | NO | 46,47              |
| POMACENTRIDAE  | Pomacentrus       | lepidogenys     | ICP | 10627 | 9    | 20    | 11  | NO  | DEM | NO  | NO  | NO | 47                 |
| POMACENTRIDAE  | Pomacentrus       | moluccensis     | ICP | 9770  | 9    | 19.17 | 13  | YES | DEM | NO  | NO  | NO | 2,6,15,20,46,47,PS |
| POMACENTRIDAE  | Pomacentrus       | nagasakiensis   | ICP | 10470 | 10   | 22.35 | 32  | YES | DEM | NO  | YES | NO | 3,45               |
| POMACENTRIDAE  | Pomacentrus       | pavo            | ICP | 17127 | 8    | 26.24 | 15  | YES | DEM | NO  | YES | NO | 45,46,47,PS        |
| POMACENTRIDAE  | Pomacentrus       | philippinus     | ICP | 11770 | 10   | 16    | 11  | YES | DEM | NO  | NO  | NO | 47                 |
| POMACENTRIDAE  | Pomacentrus       | reidi           | ICP | 5649  | 9    | 18    | 67  | NO  | DEM | NO  | NO  | NO | 47                 |
| POMACENTRIDAE  | Pomacentrus       | simsiang        | ICP | 6740  | 7    | 15.8  | 10  | NO  | DEM | NO  | NO  | NO | 47                 |
| POMACENTRIDAE  | Pomacentrus       | taeniometopon   | ICP | 4700  | 12   | 15.7  | 8   | NO  | DEM | NO  | YES | NO | 47                 |
| POMACENTRIDAE  | Pomacentrus       | vaiuli          | ICP | 7930  | 10   | 21.16 | 44  | NO  | DEM | NO  | NO  | NO | 2,46,47            |
| POMACENTRIDAE  | Pomacentrus       | wardi           | ICP | 2570  | 8    | 21.66 | 19  | NO  | DEM | NO  | NO  | NO | 2,6,20,46          |
| POMACENTRIDAE  | Pomachromis       | richardsoni     | ICP | 16219 | 9.5  | 21.7  | 10  | YES | DEM | NO  | NO  | NO | 9                  |
| POMACENTRIDAE  | Premnas           | biaculeatus     | ICP | 6800  | 17   | 9.2   | 15  | NO  | DEM | NO  | NO  | NO | PS*                |
| POMACENTRIDAE  | Pristotis         | obtusirostris   | ICP | 11770 | 14   | 25.3  | 78  | YES | DEM | NO  | YES | NO | 46                 |
| POMACENTRIDAE  | Stegastes         | acapulcoensis   | TEP | 5484  | 17   | 22    | 14  | NO  | DEM | NO  | NO  | NO | 34,47              |
| POMACENTRIDAE  | Stegastes         | adustus         | TA  | 4199  | 12   | 23.8  | 3   | NO  | DEM | NO  | YES | NO | 47                 |
| POMACENTRIDAE  | Stegastes         | apicalis        | ICP | 2570  | 15   | 29.7  | 4   | NO  | DEM | NO  | NO  | NO | 46                 |
| POMACENTRIDAE  | Stegastes         | arcifrons       | TEP | 1200  | 15   | 27.55 | 19  | NO  | DEM | NO  | NO  | NO | 34,47              |
| POMACENTRIDAE  | Stegastes         | baldwini        | TEP | 8     | 9    | 26    | 4   | NO  | DEM | NO  | NO  | NO | 34                 |
| POMACENTRIDAE  | Stegastes         | beebei          | TEP | 1700  | 15   | 32.3  | 4   | NO  | DEM | NO  | NO  | NO | 34,47              |
| POMACENTRIDAE  | Stegastes         | diaencaeus      | TA  | 3900  | 15   | 25.72 | 43  | NO  | DEM | NO  | NO  | NO | 3,45               |
| POMACENTRIDAE  | Stegastes         | emeryi          | ICP | 1344  | 10   | 22.6  | 17  | NO  | DEM | NO  | NO  | NO | PS*                |
| POMACENTRIDAE  | Stegastes         | fasciolatus     | ICP | 21680 | 15   | 29.95 | 29  | NO  | DEM | NO  | NO  | NO | 46,47,PS           |
| POMACENTRIDAE  | Stegastes         | flavilatus      | TEP | 5000  | 10   | 28.5  | 9   | NO  | DEM | NO  | NO  | NO | 34,47              |
| POMACENTRIDAE  | Stegastes         | leucorus        | TEP | 1100  | 14   | 32.86 | 14  | NO  | DEM | NO  | NO  | NO | 34,47              |
| POMACENTRIDAE  | Stegastes         | leucostictus    | TA  | 3900  | 12   | 25.29 | 10  | NO  | DEM | NO  | YES | NO | 3,45,47            |
| POMACENTRIDAE  | Stegastes         | lividus         | ICP | 500   | 8.9  | 25    | 4   | NO  | DEM | NO  | NO  | NO | 47                 |
| POMACENTRIDAE  | Stegastes         | nigricans       | ICP | 18700 | 14   | 31.68 | 11  | NO  | DEM | NO  | NO  | NO | 15,20,46,47,PS     |
| POMACENTRIDAE  | Stegastes         | partitus        | TA  | 4199  | 10   | 31.41 | 100 | NO  | DEM | NO  | YES | NO | 3,45,47,PS         |
| POMACENTRIDAE  | Stegastes         | planifrons      | TA  | 4199  | 15   | 24.1  | 29  | NO  | DEM | NO  | YES | NO | 45,47              |
| POMACENTRIDAE  | Stegastes         | punctatus       | ICP | 19720 | 15   | 25    | 12  | NO  | DEM | NO  | NO  | NO | 47                 |
| POMACENTRIDAE  | Stegastes         | rectifraenum    | TEP | 1350  | 9    | 21.5  | 9   | NO  | DEM | NO  | NO  | NO | 34                 |
| POMACENTRIDAE  | Stegastes         | redemptus       | TEP | 1000  | 12   | 27.65 | 14  | NO  | DEM | NO  | NO  | NO | 34,47              |
| POMACENTRIDAE  | Stegastes         | xanthurus       | TA  | 4199  | 12   | 24.5  | 30  | NO  | DEM | NO  | YES | NO | 45,47,PS           |
| POMACENTRIDAE  | Teixeirichthys    | jordani         | ICP | 13160 | 14   | 25.3  | 16  | YES | DEM | NO  | YES | NO | 46                 |
| PRIACANTHIDAE  | Heteropriacanthus | cruentatus      | TA  | 12481 | 51   | 32.8  | 297 | YES | PEL | YES | NO  | NO | PS*                |
| PSEUDOCROMIDAE | Pseudochromis     | quinquedentatus | ICP | 3682  | 9.5  | 61    | 40  | NO  | DEM | NO  | YES | NO | 3                  |
| PTEREOLOTRIDAE | Ptereleotris      | calliura        | TA  | 1600  | 12.5 | 22.5  | 45  | NO  | DEM | NO  | YES | NO | PS*                |
| SCORPAENIDAE   | Pterois           | radiata         | ICP | 20629 | 18   | 40    | 29  | NO  | PEL | YES | NO  | NO | PS*                |
| SCORPAENIDAE   | Pterois           | volitans        | ICP | 11992 | 38   | 26.2  | 53  | NO  | PEL | YES | YES | NO | 49                 |
| SCORPAENIDAE   | Scorpaena         | inermis         | TA  | 4199  | 11   | 22    | 72  | NO  | PEL | YES | YES | NO | PS*                |
| SCORPAENIDAE   | Scorpaena         | plumieri        | TA  | 10861 | 45   | 21    | 59  | NO  | PEL | YES | YES | NO | PS*                |
| SCORPAENIDAE   | Scorpaenodes      | caribbaeus      | TA  | 10002 | 12   | 33    | 18  | NO  | PEL | YES | NO  | NO | PS*                |
| SCORPAENIDAE   | Scorpaenodes      | guamensis       | ICP | 19720 | 12.5 | 32.4  | 5   | NO  | PEL | YES | NO  | NO | PS*                |
| SCORPAENIDAE   | Scorpaenopsis     | diabolus        | ICP | 21011 | 23.4 | 29.8  | 69  | NO  | PEL | YES | YES | NO | PS*                |
| SERRANIDAE     | Diplectrum        | formosum        | TA  | 10861 | 30   | 17.2  | 79  | NO  | PEL | NO  | YES | NO | PS*                |
| SERRANIDAE     | Gammistes         | sexlineatus     | ICP | 19720 | 30   | 42    | 129 | NO  | PEL | YES | NO  | NO | PS*                |
| SERRANIDAE     | Hypoplectrus      | puella          | TA  | 4091  | 15   | 19.1  | 20  | NO  | PEL | NO  | YES | NO | PS*                |
| SERRANIDAE     | Pseudanthias      | pascalus        | ICP | 9651  | 20   | 26    | 55  | YES | PEL | NO  | NO  | NO | 2                  |
| SERRANIDAE     | Pseudogramma      | polyacantha     | ICP | 20329 | 8.6  | 32.3  | 14  | NO  | PEL | YES | NO  | NO | PS*                |
| SERRANIDAE     | Pseudogramma      | xanthum         | ICP | 4592  | 4.1  | 30.5  | 40  | NO  | PEL | YES | NO  | NO | PS*                |
| SERRANIDAE     | Rypticus          | saponaceus      | TA  | 11400 | 35   | 40    | 61  | NO  | PEL | YES | YES | NO | 10                 |
| SERRANIDAE     | Serranus          | baldwini        | TA  | 9501  | 7.4  | 23.6  | 79  | NO  | PEL | NO  | YES | NO | PS*                |
| SERRANIDAE     | Serranus          | tigrinus        | TA  | 4199  | 12.3 | 18.2  | 40  | NO  | PEL | NO  | YES | NO | PS*                |
| SIGANIDAE      | Siganus           | canaliculatus   | ICP | 10841 | 29   | 27.5  | 47  | YES | PEL | NO  | YES | NO | 16                 |
| SIGANIDAE      | Siganus           | doliatus        | ICP | 6880  | 25   | 23.9  | 4   | NO  | PEL | NO  | NO  | NO | PS*                |

|                |                |              |     |       |     |       |     |     |     |    |     |     |      |
|----------------|----------------|--------------|-----|-------|-----|-------|-----|-----|-----|----|-----|-----|------|
| SIGANIDAE      | Siganus        | fuscescens   | ICP | 8666  | 32  | 19.2  | 49  | YES | PEL | NO | YES | NO  | PS*  |
| SIGANIDAE      | Siganus        | lineatus     | ICP | 10395 | 43  | 33    | 24  | YES | PEL | NO | YES | NO  | 16   |
| SIGANIDAE      | Siganus        | rivulatus    | ICP | 3609  | 27  | 39    | 29  | YES | PEL | NO | NO  | NO  | PS*  |
| SIGANIDAE      | Siganus        | spinus       | ICP | 14637 | 24  | 22    | 49  | YES | PEL | NO | YES | NO  | 53   |
| SIGANIDAE      | Siganus        | vermiculatus | ICP | 11262 | 37  | 23    | 5   | YES | PEL | NO | YES | NO  | 16   |
| SIGANIDAE      | Siganus        | vulpinus     | ICP | 9651  | 25  | 23.5  | 29  | NO  | PEL | NO | NO  | NO  | 2    |
| SPARIDAE       | Acanthopagrus  | latus        | ICP | 11281 | 50  | 33.7  | 49  | YES | PEL | NO | YES | NO  | 54   |
| SPARIDAE       | Archosargus    | rhomboidalis | TA  | 10373 | 33  | 21    | 29  | NO  | PEL | NO | YES | NO  | 30   |
| SPARIDAE       | Boops          | boops        | TA  | 10642 | 36  | 16.7  | 350 | YES | PEL | NO | YES | NO  | 7    |
| SPARIDAE       | Diplodus       | puntazzo     | TA  | 9115  | 60  | 32.7  | 150 | YES | PEL | NO | YES | NO  | 7    |
| SPARIDAE       | Oblada         | melanura     | TA  | 13077 | 34  | 16    | 30  | YES | PEL | NO | YES | NO  | 7    |
| SPARIDAE       | Pagrus         | pagrus       | TA  | 13439 | 90  | 38    | 250 | NO  | PEL | NO | YES | NO  | 7    |
| SPARIDAE       | Sarpa          | salpa        | TA  | 11400 | 51  | 31.5  | 65  | YES | PEL | NO | YES | NO  | 7    |
| SPARIDAE       | Spondyliosoma  | cantharus    | TA  | 13077 | 60  | 35.85 | 295 | YES | PEL | NO | YES | NO  | 7    |
| SYNODONTIDAE   | Synodus        | saurus       | TA  | 15875 | 40  | 19    | 400 | NO  | PEL | NO | YES | NO  | PS*  |
| SYNODONTIDAE   | Synodus        | variegatus   | ICP | 21500 | 28  | 42    | 118 | NO  | PEL | NO | YES | NO  | PS*  |
| TETRAODONTIDAE | Arothron       | hispidus     | ICP | 27631 | 48  | 40.8  | 47  | NO  | PEL | NO | YES | YES | PS*  |
| TETRAODONTIDAE | Canthigaster   | valentini    | ICP | 21500 | 10  | 18    | 54  | NO  | PEL | NO | NO  | NO  | PS*  |
| TRIPTERYGIIDAE | Axoclinus      | nigricaudus  | TEP | 998   | 4.5 | 18    | 3   | NO  | DEM | NO | NO  | NO  | 12   |
| TRIPTERYGIIDAE | Enneapterygius | atriceps     | ICP | 2100  | 2.6 | 30    | 22  | NO  | DEM | NO | NO  | NO  | 56   |
| ZANCLIDAE      | Zanclus        | cornutus     | ICP | 27631 | 23  | 57.9  | 179 | NO  | PEL | NO | NO  | YES | 2,PS |

## Appendix 1. References in Table S1

1. L. A. Rocha, A. L. Bass, D. R. Robertson, B. W. Bowen, Adult habitat preferences, larval dispersal, and the comparative phylogeography of three Atlantic surgeonfishes (Teleostei : Acanthuridae). *Mol Ecol* **11**, 243 (2002).
2. E. B. Brothers, R. E. Thresher, in *The ecology of coral reefs*, M. L. Reaka, Ed. (US Department of Commerce, Washington, D.C, 1985), pp. 53–69.
3. D. T. Wilson, M. I. McCormick, Microstructure of settlement-marks in the otoliths of tropical reef fishes. *Mar Biol* **134**, 29 (1999).
4. D. C. Lou, Growth in juvenile *Scarus rivulatus* and *Ctenochaetus binotatus*: a comparison of families Scaridae and Acanthuridae. *J Fish Biol* **42**, 15 (1993).
5. S. D. Job, D. R. Bellwood, Light sensitivity in larval fishes: Implications for vertical zonation in the pelagic zone. *Limnol Oceanogr* **45**, 362 (2000).
6. E. B. Brothers, D. M. Williams, P. F. Sale, Length of larval life in twelve families of fishes at "One Tree Lagoon", Great Barrier Reef, Australia. *Mar Biol* **76**, 319 (1983).
7. E. Macpherson, N. Raventos, Relationship between pelagic larval duration and geographic distribution of Mediterranean littoral fishes. *Mar Ecol Prog Ser* **327**, 257 (2006).
8. Soeparno, Y. Nakamura, T. Shibuno, K. Yamaoka, Relationship between pelagic larval duration and abundance of tropical fishes on temperate coasts of Japan. *J Fish Biol* **80**, 346 (2012).
9. T. Ishihara, K. Tachihara, Pelagic Larval Duration and Settlement Size of Apogonidae, Labridae, Scaridae, and Tripterygiidae Species in a Coral Lagoon of Okinawa Island, Southern Japan. *Pac Sci* **65**, 87 (2011).
10. B. W. Bowen, A. L. Bass, A. Muss, J. Carlin, D. R. Robertson, Phylogeography of two Atlantic squirrelfishes (Family Holocentridae): exploring

links between pelagic larval duration and population connectivity. *Mar Biol* **149**, 899 (2006).

11. D. R. Robertson, Extreme variation in settlement of the Caribbean triggerfish *Balistes vetula* in Panama. *Copeia* **1988**, 698 (1988).
12. C. Riginos, B. C. Victor, Larval spatial distributions and other early life-history characteristics predict genetic differentiation in eastern Pacific blennioid fishes. *P Roy Soc B-Biol Sci* **268**, 1931 (2001).
13. R. Beldade, T. Pedro, E. J. Goncalves, Pelagic larval duration of 10 temperate cryptobenthic fishes. *J Fish Biol* **71**, 376 (2007).
14. M. J. Shulman, What can population genetics tell us about dispersal and biogeographic history of coral-reef fishes? *Aust J Ecol* **23**, 216 (1998).
15. F. Bonhomme, S. Planes, Some evolutionary arguments about what maintains the pelagic interval in reef fishes. *Environ Biol Fish* **59**, 365 (2000).
16. R. Froese, D. Pauly. (2012).
17. D. J. Booth, K. Parkinson, Pelagic larval duration is similar across 23 degrees of latitude for two species of butterflyfish (Chaetodontidae) in eastern Australia. *Coral Reefs* **30**, 1071 (2011).
18. A. J. Fowler, Description, interpretation and use of the microstructure of otoliths from juvenile butterflyfishes (family Chaetodontidae). *Mar Biol* **102**, 167 (1989).
19. G. R. Almany, M. L. Berumen, S. R. Thorrold, S. Planes, G. P. Jones, Local replenishment of coral reef fish populations in a marine reserve. *Science* **316**, 742 (2007).
20. L. K. Bay, K. Buechler, M. Gagliano, M. J. Caley, Intraspecific variation in the pelagic larval duration of tropical reef fishes. *J Fish Biol* **68**, 1206 (2006).
21. D. J. Shafer, University of Hawaii (1998).
22. S. Sponaugle, R. K. Cowen, Larval durations and recruitment patterns of two Caribbean gobies (Gobiidae): contrasting early-life histories in demersal spawners. *Mar Biol* **120**, 133 (1994).

23. B. C. Victor *et al.*, The larval, juvenile, and adult stages of the Caribbean goby, *Coryphopterus kuna* (Teleostei: Gobiidae): a reef fish with a pelagic larval duration longer than the post-settlement lifespan. *Zootaxa*, 53 (2010).
24. M. S. Taylor, M. E. Hellberg, Genetic evidence for local retention of pelagic larvae in a Caribbean reef fish. *Science* **299**, 107 (2003).
25. A. L. Shanks, B. A. Grantham, M. H. Carr, Propagule dispersal distance and the size and spacing of marine reserves. *Ecol Appl* **13**, S159 (2003).
26. M. A. Steele, The relative importance of processes affecting recruitment of two temperate reef fishes. *Ecology* **78**, 129 (1997).
27. R. S. Waples, R. H. Rosenblatt, Patterns of larval drift in southern California (USA) marine shore fishes inferred from allozyme data. *Fishery Bulletin* **85**, 1 (1987).
28. R. Winterbottom, K. M. Alofs, A. Marseu, Life span, growth and mortality in the western Pacific goby *Trimma benjamini*, and comparisons with *T. nasa*. *Environ Biol Fish* **91**, 295 (2011).
29. R. Winterbottom, L. Southcott, Short lifespan and high mortality in the western Pacific coral reef goby *Trimma nasa*. *Mar Ecol Prog Ser* **366**, 203 (2008).
30. E. D. Houde, Comparative growth, mortality, and energetics of marine fish larvae: temperature and implied latitudinal effects. *Fishery Bulletin* **87**, 471 (1989).
31. K. C. Lindeman, R. Pugliese, G. T. Waugh, J. S. Ault, Developmental patterns within a multispecies reef fishery: Management applications for essential fish habitats and protected areas. *B Mar Sci* **66**, 929 (2000).
32. J. C. Tyler, G. D. Johnson, E. B. Brothers, D. M. Tyler, C. L. Smith, Comparative early-life histories of Western Atlantic squirrelfishes (Holocentridae): age and settlement of rhynchichthys, meeki, and juvenile stages. *B Mar Sci* **53**, 1126 (1993).
33. B. C. Victor, Duration of the planktonic larval stage of one hundred species of Pacific and Atlantic wrasses (family Labridae). *Mar Biol* **90**, 317 (1986).

34. B. C. Victor, G. M. Wellington, Endemism and the pelagic larval duration of reef fishes in the eastern Pacific Ocean. *Mar Ecol-Prog Ser* **205**, 241 (2000).
35. E. T. Schultz, R. K. Cowen, Recruitment of coral-reef fishes to Bermuda - local retention or long-distance transport. *Mar Ecol Prog Ser* **109**, 15 (1994).
36. F. A. Zapata, P. A. Herron, Pelagic larval duration and geographic distribution of tropical eastern Pacific snappers (Pisces : Lutjanidae). *Mar Ecol Prog Ser* **230**, 295 (2002).
37. O. Aburto-Oropeza, I. Dominguez-Guerrero, J. Cota-Nieto, T. Plomozo-Lugo, Recruitment and ontogenetic habitat shifts of the yellow snapper (*Lutjanus argentiventris*) in the Gulf of California. *Mar Biol* **156**, 2461 (2009).
38. J. R. Rooker, A. M. Landry, B. W. Geary, J. A. Harper, Assessment of a shell bank and associated substrates as nursery habitat of postsettlement red snapper. *Estuar Coast Shelf S* **59**, 653 (2004).
39. H. B. Harrison *et al.*, Larval export from marine reserves and the recruitment benefit for fish and fisheries. *Curr Biol* **22**, 1023 (2012).
40. B. C. Victor, R. Hanner, M. Shivji, J. Hyde, C. Caldow, Identification of the larval and juvenile stages of the Cubera Snapper, *Lutjanus cyanopterus*, using DNA barcoding. *Zootaxa*, 24 (2009).
41. R. J. Allman, C. B. Grimes, Temporal and spatial dynamics of spawning, settlement, and growth of gray snapper (*Lutjanus griseus*) from the West Florida shelf as determined from otolith microstructures. *Fishery Bulletin* **100**, 391 (2002).
42. J. Ben-David, J. P. Kritzer, Early life history and settlement of the slender filefish, *Monacanthus tuckeri* (Monacanthidae), at Calabash Caye, Turneffe Atoll, Belize. *Environ Biol Fish* **73**, 275 (2005).
43. M. I. McCormick, Variability in age and size at settlement of the tropical goatfish *Upeneus tragula* (Mullidae) in the Northern Great-Barrier-Reef Lagoon. *Mar Ecol Prog Ser* **103**, 1 (1994).



44. R. E. Thresher, E. B. Brothers, Reproductive ecology and biogeography of Indo-west Pacific angelfishes (Pisces: Pomacanthidae). *Evolution* **39**, 878 (1985).
45. R. E. Thresher, E. B. Brothers, Evidence of intra and inter-oceanic regional differences in the early life history of reef-associated fishes. *Mar Ecol Prog Ser* **57**, 187 (1989).
46. R. E. Thresher, P. L. Colin, L. J. Bell, Planktonic duration, distribution and population structure of western and central Pacific damselfishes (Pomacentridae). *Copeia* **1989**, 420 (1989).
47. G. M. Wellington, B. C. Victor, Planktonic larval duration of one hundred species of Pacific and Atlantic damselfishes (Pomacentridae). *Mar Biol* **101**, 557 (1989).
48. B. S. Green, R. Fisher, Temperature influences swimming speed, growth and larval duration in coral reef fish larvae. *J Exp Mar Biol Ecol* **299**, 115 (2004).
49. D. W. Ahrenholz, J. A. Morris, Larval duration of the lionfish, *Pterois volitans* along the Bahamian Archipelago. *Environ Biol Fish* **88**, 305 (2010).
50. M. R. Lara, J. Schull, D. L. Jones, R. J. Allman, Early life history stages of goliath grouper *Epinephelus itajara* (Pisces: Epinephelidae) from Ten Thousand Islands, Florida. *Endang Species Res* **7**, 221 (2009).
51. P. L. Colin, W. A. Laroche, E. B. Brothers, Ingress and settlement in the Nassau grouper, *Epinephelus striatus* (Pisces: Serranidae), with relationship to spawning occurrence. *B Mar Sci* **60**, 656 (1997).
52. P. Keener, G. D. Johnson, B. W. Stender, E. B. Brothers, H. R. Beatty, Ingress of postlarval gag, *Mycteroperca microlepis* (Pisces: Serranidae), through a South Carolina barrier island inlet. *B Mar Sci* **42**, 376 (1988).
